# Supplementary material for: Burden of ischemic stroke attributed to diet high in sugar-sweetened beverages burdens in 204 countries and territories from 1990--2021
Source: Research Square preprint supplement (doi:10.21203/rs.3.rs-5827863/v1), 2025-01-17
Supplement: Supplementary file 1 [file 1b5c7459c399e735eece10e8.docx]

**SUPPLEMENTAL MATERIAL**

**eMethods 1.** Data Collection

**eMethods 2.** Sociodemographic Index

**eMethods 3.** Estimated Annual Percentage Changes

**eMethods 4.** Cross-country inequalities analysis

**eMethods 5.** Age-period-cohort model

**eMethods 6.**Decomposition Analysis

**eMethods 7.**Bayesian Age-Period-Cohort Models with Projections

**TABLE S1.** Deaths number, and ASMR of ischemic stroke attributed to diet high in sugar-sweetened beverages in 1990 and 2021, and and its temporal trends from 1990 to 2021

**TABLE S2.** DALYs number, and ASMR of ischemic stroke attributed to diet high in sugar-sweetened beverages in 1990 and 2021, and and its temporal trends from 1990 to 2021

**TABLE S3.** Crude mortality rate of IS death by age, period and median birth cohorts in Global and different SDI areas.(per 100 000)

**FIG S1**:Global burden of disease of IS attributed to high dietary SSB in 204 countries and territories in 2021. (A) ASDR of IS.(B) ASDR of IS. (C) Mortality from IS. (D)DALY rate of IS

**FIG S2**.A-F: DALYs of IS attributed to SSB by period across Global, SDI areas.G-L cohort-specific mortality rate of IS attributed to SSB by age group .

**eMethods 1. Data Collection**

The data used in this study comes from the Global Burden of Disease Study 2021 (GBD 2021). This study provides comprehensive data on incidence, prevalence, mortality, and Disability-Adjusted Life Years (DALYs) by country, time, age, and gender. It is the most comprehensive global epidemiological observational study to date. GBD 2021 data is collected from multiple sources, including censuses, household surveys, civil registration and vital statistics, disease registries, healthcare utilization, air pollution monitoring, satellite imagery, disease reporting, and others. These data sources are uniquely identified in the Global Health Data Exchange (GHDx) and provide metadata as well as data shared by providers with permission for dissemination. Researchers can explore the data sources used for evaluating the burden of EHCE diseases worldwide via the GBD 2021 Data Input Sources Tool available at https://vizhub.healthdata.org/gbd-results/.

After correcting for known biases, the GBD network uses the Bayesian meta-regression tool, DisMod-MR 2.1, for analysis. This tool comprehensively evaluates the available data on incidence, prevalence, and mortality for each disease, ensuring consistency among various epidemiological parameters to produce estimates of disease burden. The model can generate estimates for countries lacking original data, thereby enabling global evaluation of the EHCE burden across all countries. The methodology employed by GBD 2021, including data input and processing, is detailed in previous research literature. The statistical data provided by GBD 2021 includes estimates and their 95% uncertainty intervals, which are derived from the 25th and 975th percentiles of 1,000 estimates based on the GBD algorithm. All statistical data is reported per 100,000 population.

**eMethods 2. Sociodemographic Index**

The Socio-Demographic Index (SDI) is a composite indicator used to measure development status and is strongly correlated with health outcomes. This index is calculated based on three dimensions: total fertility rate, average education level, and per capita income, with values ranging from 0 to 1. On this scale, regions with an SDI value of 0 are at the theoretical lowest level of health-related development, while regions with an SDI value of 1 are at the theoretical highest level. Countries and regions are classified into five categories based on their SDI: low (<0.46), low-middle (0.46-0.60), middle (0.61-0.69), high-middle (0.70-0.81), and high (>0.81).

**eMethods 3. Estimated Annual Percentage Changes**

In GBD (Global Burden of Disease) analysis, EAPC (Estimated Annual Percent Changes) is used to evaluate the trend change of a disease or health indicator over a period of time. EAPC is often used to describe the rate of change of morbidity, mortality or other health indicators over time. The estimated average percentage change (EAPC) is calculated by fitting the natural logarithm of the age-standardized rate (ASR) to the year to depict the long-term trend of the disease burden ASR, that is: y=α+βx+ε. Where y=ln(ratio) specific value, x=year, ε=error term. In this formula, β, or EAPC, represents the positive or negative trend of ASR and represents the speed of change. The calculation formula for EAPC and its 95% confidence interval (CI) is 100x(exp(β)-1).

**eMethods 4. Cross-country inequalities analysis**

This study used the methods in the Global Burden of Disease (GBD) framework to conduct an in-depth analysis of health inequality, focusing on the differences in morbidity, mortality and disability-adjusted life years (DALYs) between different populations. (a) Socio-Demographic Index (SDI): Based on income, average years of education per capita and total fertility rate, the study analyzed the differences in the distribution of disease burden in regions with different levels of development. (b) Geographical region: Divided into 204 countries and regions, the study revealed the differences in disease burden in different geographical regions. (c) Age and gender differences: Analyzed the differences in disease burden between different age groups and genders and explored the influencing factors. In addition, in order to quantify inequality more accurately, the study used multiple indicators: Slope Index of Inequality (SII): Through regression analysis, the degree of inequality in health outcomes on the gradient of socioeconomic status (such as income) was quantitatively measured. The SII value reflects the absolute difference between the highest and lowest socioeconomic classes. Concentration Index of Inequality (CII): used to assess the concentration of health outcomes across the socioeconomic distribution. The closer the CII value is to zero, the more equitable the distribution. Through these methods, we can quantify differences in disease burden at the socioeconomic, regional and population levels and reveal the key drivers of health inequality.

**eMethods 5. Age-period-cohort model**

The Age-Period-Cohort (APC) model is a commonly used statistical model for extracting information hidden in mortality rates, including the mortality risks experienced by populations in specific years and the cumulative health risks since birth. This model can analyze the independent effects of age, period, and cohort on the time trends of stroke mortality. It has been used in the descriptive epidemiology of certain chronic diseases. The age effect represents the varying risks across different age groups. The period effect reflects changes in cardiovascular disease (CVD) mortality attributable to non-optimal temperatures across all age groups over time, which may be due to changes in social, cultural, economic, or physical environments. The birth cohort effect reflects the characteristics of individuals born in the same year and considers early-life risk factors and environmental influences.

For the age-period-cohort analysis, we arrange the mortality and population data into continuous 5-year age groups from 20-25 years to 95+ years, and 21 consecutive birth cohorts from 1895-1899 (median year 1897) to 1995-1999 (median year 1997). The estimated coefficients of the parameters (perfect collinearity of age, period, and cohort variables) are obtained through age-period-cohort analysis using intrinsic estimation methods. The age-period-cohort analysis was performed using the Analysis Tools (https://analysistools.nci.nih.gov/apc/help.html).

eMethods 6.**Decomposition Analysis**

The study used a robust decomposition method to analyze the data, attributing the differences in incidence, mortality, and DALYs (Disability-Adjusted Life Years) between two time points to changes in three independent factors:

(a) Aging: Changes in the population’s age structure, specifically the shift toward a larger elderly population, commonly referred to as population aging.

(b) Population: Changes in population size.

(c) Epidemiological change: Changes in age-specific rates, reflecting the combined effects of all factors excluding age structure and population size.

The equations are as follows:

A = Ma + Iam + Ipa + Ipam,

where A represents the main effect of population aging, Ma is the effect of age-specific mortality rates, Iam is the interaction effect between aging and age-specific rates, Ipa is the interaction effect between aging and population growth, and Ipam is the combined interaction effect of all three.

P = Mp + Ipm + Ipa + Ipam,

where P represents the main effect of population growth, Mp is the effect of population growth, Ipm is the interaction effect between population and age-specific rates, Ipa is the interaction effect between population and aging, and Ipam is the combined interaction effect of all three.

M = Mm + Ipm + Iam + Ipam,

where M represents the main effect of changes in age-specific rates, Mm is the effect of age-specific rates, Ipm is the interaction effect between age-specific rates and population, Iam is the interaction effect between age-specific rates and aging, and Ipam is the combined interaction effect of all three.

This method decomposes the changes in disease-related mortality into factors caused by population aging (A), population growth (P), and changes in age-specific rates (M). The decomposition results include both the absolute and relative contributions of each factor to the changes in disease-related mortality. The absolute contribution represents the number of deaths attributed to the disease, while the relative contribution (i.e., the "attribution ratio") is calculated by dividing the attributed number of deaths by the total deaths in 1990 and multiplying by 100%. If the attributed deaths exceed the total deaths in 1990, this ratio may exceed 100%.

**eMethods 7.Bayesian Age-Period-Cohort Models with Projections**

BAPC (Bayesian Age-Period-Cohort) models provide a comprehensive framework for making projections using integrated nested Laplace approximations (INLA) for full Bayesian inference.（https://folk.ntnu.no/andrerie/software.html）

TABLE S1. Deaths number, and ASMR of ischemic stroke attributed to diet high in sugar-sweetened beverages in 1990 and 2021, and and its temporal trends from 1990 to 2021

| Location | 1990 | | 2021 | | EAPC_95%CI |
| --- | --- | --- | --- | --- | --- |
| Number_95%UI | ASR | Number_95%UI | ASR |
| People's Republic of China | 143.634 (66.746, 237.161) | 0.025 (0.012, 0.042) | 1464.870 (700.085, 2369.709) | 0.077 (0.036, 0.125) | 3.957 (3.759, 4.154) |
| Democratic People's Republic of Korea | 3.058 (1.352, 5.304) | 0.026 (0.012, 0.046) | 6.385 (2.508, 11.161) | 0.021 (0.009, 0.037) | -0.642 (-0.900, -0.384) |
| Taiwan (Province of China) | 8.537 (4.094, 14.274) | 0.078 (0.036, 0.131) | 10.998 (5.158, 18.261) | 0.025 (0.012, 0.041) | -3.873 (-4.271, -3.472) |
| Kingdom of Cambodia | 0.469 (0.223, 0.821) | 0.017 (0.008, 0.031) | 1.943 (0.865, 3.638) | 0.024 (0.010, 0.043) | 1.272 (1.035, 1.510) |
| Republic of Indonesia | 9.355 (4.439, 15.250) | 0.015 (0.007, 0.025) | 44.399 (20.641, 73.337) | 0.029 (0.013, 0.048) | 2.221 (1.919, 2.524) |
| Lao People's Democratic Republic | 0.397 (0.188, 0.695) | 0.027 (0.013, 0.050) | 1.083 (0.482, 1.803) | 0.033 (0.015, 0.055) | 0.673 (0.535, 0.812) |
| Malaysia | 4.872 (2.339, 8.312) | 0.062 (0.029, 0.108) | 19.176 (8.559, 31.697) | 0.080 (0.035, 0.131) | 0.992 (0.466, 1.520) |
| Republic of Maldives | 0.015 (0.007, 0.026) | 0.027 (0.013, 0.047) | 0.041 (0.017, 0.073) | 0.015 (0.007, 0.028) | -2.103 (-2.292, -1.913) |
| Republic of the Union of Myanmar | 3.501 (1.679, 6.030) | 0.020 (0.010, 0.034) | 14.144 (6.285, 25.331) | 0.036 (0.016, 0.063) | 2.508 (2.284, 2.733) |
| Republic of the Philippines | 5.835 (2.869, 9.762) | 0.030 (0.014, 0.050) | 30.807 (15.084, 49.288) | 0.047 (0.023, 0.076) | 1.833 (1.726, 1.940) |
| Democratic Socialist Republic of Sri Lanka | 2.425 (1.170, 3.978) | 0.033 (0.016, 0.056) | 11.891 (5.339, 21.270) | 0.054 (0.024, 0.095) | 2.564 (2.246, 2.883) |
| Kingdom of Thailand | 8.977 (4.271, 15.119) | 0.033 (0.016, 0.057) | 50.960 (23.703, 81.921) | 0.047 (0.022, 0.076) | 0.585 (0.228, 0.944) |
| Democratic Republic of Timor-Leste | 0.022 (0.010, 0.039) | 0.014 (0.007, 0.024) | 0.081 (0.034, 0.144) | 0.012 (0.005, 0.022) | 0.063 (-0.407, 0.536) |
| Socialist Republic of Viet Nam | 4.045 (1.872, 6.911) | 0.012 (0.006, 0.021) | 21.687 (9.893, 35.903) | 0.027 (0.013, 0.046) | 3.314 (3.073, 3.557) |
| Republic of Fiji | 0.150 (0.070, 0.274) | 0.061 (0.029, 0.110) | 0.719 (0.306, 1.266) | 0.140 (0.060, 0.247) | 1.870 (1.314, 2.429) |
| Republic of Kiribati | 0.013 (0.006, 0.025) | 0.052 (0.025, 0.096) | 0.044 (0.020, 0.078) | 0.092 (0.043, 0.159) | 2.113 (1.964, 2.262) |
| Republic of the Marshall Islands | 0.006 (0.003, 0.010) | 0.048 (0.023, 0.085) | 0.012 (0.006, 0.022) | 0.059 (0.027, 0.104) | 0.517 (0.460, 0.574) |
| Federated States of Micronesia | 0.019 (0.009, 0.035) | 0.049 (0.023, 0.088) | 0.024 (0.011, 0.042) | 0.042 (0.019, 0.075) | -0.660 (-0.738, -0.581) |
| Independent State of Papua New Guinea | 0.244 (0.103, 0.470) | 0.023 (0.010, 0.044) | 0.485 (0.203, 0.889) | 0.016 (0.007, 0.029) | -1.685 (-1.946, -1.422) |
| Independent State of Samoa | 0.040 (0.018, 0.070) | 0.060 (0.027, 0.106) | 0.129 (0.061, 0.223) | 0.110 (0.051, 0.189) | 2.580 (2.368, 2.793) |
| Solomon Islands | 0.013 (0.006, 0.024) | 0.017 (0.007, 0.031) | 0.036 (0.016, 0.068) | 0.016 (0.007, 0.030) | -0.469 (-0.616, -0.323) |
| Kingdom of Tonga | 0.009 (0.004, 0.015) | 0.020 (0.009, 0.035) | 0.025 (0.011, 0.043) | 0.033 (0.014, 0.056) | 1.656 (1.542, 1.771) |
| Republic of Vanuatu | 0.023 (0.010, 0.041) | 0.058 (0.027, 0.105) | 0.055 (0.024, 0.102) | 0.046 (0.019, 0.087) | -1.105 (-1.343, -0.866) |
| Republic of Armenia | 0.469 (0.234, 0.768) | 0.021 (0.010, 0.034) | 1.291 (0.566, 2.235) | 0.030 (0.013, 0.051) | 1.373 (0.926, 1.823) |
| Republic of Azerbaijan | 1.213 (0.550, 2.247) | 0.029 (0.013, 0.055) | 4.690 (2.053, 8.388) | 0.060 (0.026, 0.105) | 4.428 (3.519, 5.345) |
| Georgia | 2.769 (1.295, 5.045) | 0.049 (0.023, 0.091) | 4.884 (2.322, 8.332) | 0.075 (0.036, 0.125) | 2.170 (1.299, 3.048) |
| Republic of Kazakhstan | 22.558 (10.244, 41.330) | 0.213 (0.094, 0.381) | 24.028 (11.084, 39.936) | 0.181 (0.084, 0.307) | -0.559 (-0.993, -0.123) |
| Kyrgyz Republic | 3.197 (1.523, 5.319) | 0.122 (0.058, 0.209) | 3.376 (1.454, 5.964) | 0.080 (0.034, 0.140) | -1.270 (-1.522, -1.018) |
| Mongolia | 0.165 (0.075, 0.303) | 0.019 (0.009, 0.034) | 0.610 (0.270, 1.036) | 0.035 (0.015, 0.062) | 2.463 (2.150, 2.776) |
| Republic of Tajikistan | 0.999 (0.451, 1.699) | 0.042 (0.018, 0.071) | 1.428 (0.549, 2.543) | 0.035 (0.014, 0.063) | -0.319 (-0.723, 0.087) |
| Turkmenistan | 1.487 (0.673, 2.557) | 0.090 (0.042, 0.158) | 11.044 (5.112, 19.093) | 0.311 (0.145, 0.543) | 5.004 (4.328, 5.686) |
| Republic of Uzbekistan | 5.357 (2.537, 9.026) | 0.050 (0.024, 0.087) | 12.076 (5.328, 20.563) | 0.058 (0.025, 0.098) | 0.144 (-0.184, 0.474) |
| Republic of Albania | 2.728 (1.235, 4.614) | 0.175 (0.079, 0.294) | 12.277 (5.383, 21.672) | 0.304 (0.132, 0.535) | 3.057 (2.503, 3.614) |
| Bosnia and Herzegovina | 7.377 (3.524, 13.379) | 0.236 (0.113, 0.425) | 16.244 (7.094, 31.102) | 0.253 (0.111, 0.474) | 0.183 (-0.023, 0.389) |
| Republic of Bulgaria | 104.202 (51.914, 161.915) | 1.176 (0.579, 1.853) | 89.475 (40.772, 155.421) | 0.597 (0.270, 1.035) | -1.523 (-2.302, -0.738) |
| Republic of Croatia | 25.745 (12.150, 42.483) | 0.511 (0.238, 0.843) | 26.456 (11.188, 46.597) | 0.258 (0.112, 0.448) | -1.669 (-2.053, -1.284) |
| Czech Republic | 91.198 (39.505, 151.805) | 0.681 (0.298, 1.122) | 32.931 (15.477, 57.595) | 0.139 (0.064, 0.237) | -5.457 (-6.012, -4.898) |
| Hungary | 52.365 (24.193, 82.201) | 0.384 (0.180, 0.606) | 24.720 (11.201, 40.877) | 0.117 (0.053, 0.191) | -3.621 (-3.999, -3.242) |
| North Macedonia | 7.376 (3.333, 12.773) | 0.481 (0.217, 0.839) | 14.349 (6.768, 26.685) | 0.615 (0.284, 1.117) | 0.951 (0.663, 1.240) |
| Montenegro | 0.734 (0.306, 1.281) | 0.134 (0.056, 0.237) | 1.313 (0.551, 2.478) | 0.167 (0.069, 0.311) | 1.763 (0.944, 2.590) |
| Republic of Poland | 207.528 (93.368, 349.188) | 0.535 (0.240, 0.894) | 197.984 (94.654, 328.996) | 0.252 (0.121, 0.416) | -2.539 (-2.638, -2.440) |
| Romania | 112.060 (53.533, 185.379) | 0.529 (0.246, 0.898) | 322.985 (157.460, 521.010) | 0.764 (0.371, 1.216) | 1.383 (1.065, 1.702) |
| Republic of Serbia | 59.240 (27.388, 101.749) | 0.765 (0.347, 1.303) | 49.223 (23.292, 88.892) | 0.280 (0.130, 0.505) | -3.714 (-4.085, -3.342) |
| Slovak Republic | 21.232 (10.526, 34.683) | 0.378 (0.181, 0.625) | 23.034 (10.108, 38.073) | 0.240 (0.106, 0.397) | -1.485 (-1.882, -1.086) |
| Republic of Slovenia | 7.991 (3.589, 14.254) | 0.327 (0.147, 0.568) | 9.411 (3.961, 15.544) | 0.166 (0.069, 0.274) | -1.817 (-2.004, -1.629) |
| Republic of Belarus | 7.269 (3.233, 12.576) | 0.058 (0.026, 0.099) | 8.824 (3.830, 15.710) | 0.053 (0.023, 0.094) | -0.666 (-0.871, -0.460) |
| Republic of Estonia | 3.429 (1.614, 6.243) | 0.171 (0.080, 0.309) | 2.089 (0.934, 3.574) | 0.064 (0.029, 0.105) | -4.318 (-4.926, -3.707) |
| Republic of Latvia | 6.667 (3.049, 11.156) | 0.189 (0.086, 0.311) | 6.355 (2.939, 11.948) | 0.132 (0.062, 0.237) | -1.118 (-1.567, -0.667) |
| Republic of Lithuania | 5.447 (2.468, 9.145) | 0.122 (0.056, 0.207) | 10.090 (4.434, 18.056) | 0.145 (0.065, 0.257) | 0.762 (0.457, 1.069) |
| Republic of Moldova | 1.342 (0.629, 2.288) | 0.040 (0.018, 0.070) | 2.150 (0.922, 3.691) | 0.035 (0.015, 0.060) | 0.374 (-0.329, 1.082) |
| Russian Federation | 305.557 (143.265, 503.911) | 0.196 (0.093, 0.328) | 447.718 (224.078, 744.946) | 0.185 (0.093, 0.301) | -0.173 (-0.492, 0.148) |
| Ukraine | 65.540 (31.779, 110.097) | 0.102 (0.050, 0.172) | 43.506 (20.771, 74.447) | 0.054 (0.026, 0.094) | -1.949 (-2.308, -1.588) |
| Brunei Darussalam | 0.052 (0.023, 0.092) | 0.075 (0.033, 0.139) | 0.098 (0.046, 0.175) | 0.047 (0.022, 0.085) | -1.187 (-1.413, -0.959) |
| Japan | 348.682 (163.855, 561.158) | 0.239 (0.109, 0.385) | 376.079 (175.283, 661.420) | 0.061 (0.030, 0.102) | -4.756 (-5.014, -4.497) |
| Republic of Korea | 30.102 (14.120, 49.221) | 0.157 (0.072, 0.261) | 57.062 (26.390, 98.296) | 0.062 (0.029, 0.107) | -3.602 (-3.926, -3.277) |
| Republic of Singapore | 1.828 (0.866, 3.086) | 0.106 (0.048, 0.183) | 2.208 (0.982, 3.743) | 0.027 (0.012, 0.046) | -4.068 (-4.586, -3.548) |
| Australia | 50.504 (23.782, 84.290) | 0.282 (0.134, 0.477) | 57.710 (26.960, 95.388) | 0.102 (0.049, 0.168) | -3.253 (-3.442, -3.063) |
| New Zealand | 7.499 (3.451, 12.991) | 0.203 (0.094, 0.356) | 9.421 (4.507, 16.342) | 0.098 (0.047, 0.170) | -2.657 (-2.939, -2.373) |
| Principality of Andorra | 0.083 (0.036, 0.143) | 0.189 (0.079, 0.327) | 0.149 (0.061, 0.271) | 0.080 (0.034, 0.145) | -2.317 (-2.506, -2.128) |
| Republic of Austria | 20.744 (8.946, 35.076) | 0.168 (0.073, 0.285) | 16.096 (7.442, 26.650) | 0.067 (0.031, 0.109) | -3.414 (-3.649, -3.178) |
| Kingdom of Belgium | 40.412 (18.297, 69.193) | 0.259 (0.115, 0.433) | 28.780 (13.369, 49.340) | 0.091 (0.043, 0.156) | -3.252 (-3.354, -3.149) |
| Republic of Cyprus | 0.947 (0.452, 1.770) | 0.213 (0.100, 0.399) | 0.761 (0.299, 1.370) | 0.055 (0.021, 0.102) | -4.669 (-5.124, -4.212) |
| Kingdom of Denmark | 11.532 (5.262, 20.107) | 0.128 (0.058, 0.224) | 11.154 (5.146, 20.024) | 0.078 (0.035, 0.138) | -1.997 (-2.399, -1.592) |
| Republic of Finland | 16.779 (7.748, 28.456) | 0.236 (0.107, 0.391) | 11.094 (5.215, 20.031) | 0.065 (0.031, 0.117) | -3.760 (-4.029, -3.490) |
| French Republic | 122.829 (56.758, 202.164) | 0.136 (0.063, 0.226) | 107.818 (48.868, 191.149) | 0.051 (0.024, 0.089) | -3.121 (-3.265, -2.977) |
| Federal Republic of Germany | 258.473 (120.697, 444.765) | 0.196 (0.091, 0.335) | 132.871 (57.090, 232.424) | 0.053 (0.023, 0.092) | -3.966 (-4.146, -3.786) |
| Hellenic Republic | 65.269 (31.088, 109.966) | 0.480 (0.229, 0.790) | 46.145 (21.465, 86.695) | 0.125 (0.059, 0.225) | -5.055 (-5.433, -4.675) |
| Republic of Iceland | 0.614 (0.317, 1.054) | 0.196 (0.101, 0.337) | 0.417 (0.183, 0.707) | 0.056 (0.026, 0.096) | -3.753 (-3.981, -3.525) |
| Ireland | 11.463 (5.549, 18.788) | 0.309 (0.142, 0.519) | 8.257 (3.489, 14.223) | 0.094 (0.040, 0.161) | -3.752 (-4.019, -3.484) |
| State of Israel | 7.037 (3.273, 11.669) | 0.169 (0.078, 0.279) | 7.837 (3.361, 14.698) | 0.052 (0.022, 0.096) | -4.383 (-4.671, -4.093) |
| Republic of Italy | 188.279 (77.595, 324.658) | 0.224 (0.096, 0.384) | 174.659 (75.808, 321.044) | 0.079 (0.035, 0.142) | -3.612 (-3.772, -3.451) |
| Grand Duchy of Luxembourg | 2.260 (1.032, 3.807) | 0.419 (0.189, 0.698) | 0.488 (0.216, 0.850) | 0.039 (0.017, 0.069) | -7.243 (-7.409, -7.077) |
| Republic of Malta | 1.193 (0.547, 1.978) | 0.302 (0.138, 0.497) | 0.691 (0.299, 1.184) | 0.059 (0.025, 0.100) | -5.580 (-6.199, -4.958) |
| Kingdom of the Netherlands | 35.502 (16.628, 57.649) | 0.173 (0.082, 0.282) | 38.545 (19.115, 68.145) | 0.093 (0.046, 0.164) | -2.555 (-2.906, -2.203) |
| Kingdom of Norway | 19.326 (9.255, 32.767) | 0.245 (0.118, 0.416) | 10.604 (4.626, 18.108) | 0.082 (0.035, 0.137) | -3.891 (-4.210, -3.570) |
| Portuguese Republic | 68.995 (31.872, 119.359) | 0.591 (0.272, 0.992) | 37.084 (16.804, 68.209) | 0.109 (0.050, 0.193) | -6.492 (-6.883, -6.099) |
| Kingdom of Spain | 116.585 (54.054, 203.784) | 0.228 (0.106, 0.399) | 71.092 (30.648, 127.258) | 0.051 (0.023, 0.087) | -5.298 (-5.675, -4.918) |
| Kingdom of Sweden | 18.304 (8.473, 31.922) | 0.106 (0.050, 0.182) | 16.258 (6.972, 28.747) | 0.056 (0.024, 0.098) | -2.144 (-2.564, -1.723) |
| Swiss Confederation | 12.747 (6.152, 20.993) | 0.109 (0.053, 0.183) | 6.818 (2.739, 13.239) | 0.026 (0.011, 0.050) | -4.304 (-4.539, -4.069) |
| United Kingdom of Great Britain and Northern Ireland | 93.813 (46.442, 157.721) | 0.097 (0.049, 0.162) | 46.527 (21.877, 80.371) | 0.029 (0.013, 0.049) | -4.263 (-4.673, -3.852) |
| Argentine Republic | 84.722 (40.220, 141.841) | 0.300 (0.145, 0.505) | 93.543 (45.521, 155.709) | 0.158 (0.077, 0.263) | -1.559 (-1.718, -1.399) |
| Republic of Chile | 14.399 (7.034, 24.259) | 0.171 (0.083, 0.291) | 27.208 (12.677, 44.828) | 0.102 (0.048, 0.169) | -1.466 (-1.753, -1.178) |
| Eastern Republic of Uruguay | 8.750 (3.861, 14.277) | 0.229 (0.099, 0.374) | 10.748 (5.001, 18.490) | 0.157 (0.073, 0.264) | -1.370 (-1.697, -1.043) |
| Canada | 17.678 (7.961, 29.809) | 0.056 (0.025, 0.094) | 26.583 (12.030, 44.795) | 0.031 (0.014, 0.051) | -2.456 (-3.024, -1.885) |
| United States of America | 568.777 (266.378, 914.853) | 0.166 (0.078, 0.264) | 668.443 (307.211, 1086.497) | 0.104 (0.048, 0.167) | -2.740 (-3.243, -2.234) |
| Antigua and Barbuda | 0.016 (0.007, 0.026) | 0.027 (0.012, 0.047) | 0.018 (0.008, 0.031) | 0.021 (0.010, 0.036) | -0.857 (-1.248, -0.464) |
| Commonwealth of the Bahamas | 0.058 (0.027, 0.103) | 0.046 (0.021, 0.084) | 0.086 (0.039, 0.157) | 0.025 (0.012, 0.047) | -1.758 (-1.952, -1.564) |
| Barbados | 0.662 (0.298, 1.227) | 0.229 (0.102, 0.405) | 0.588 (0.259, 1.043) | 0.115 (0.050, 0.201) | -2.253 (-2.500, -2.006) |
| Belize | 0.019 (0.009, 0.032) | 0.021 (0.009, 0.036) | 0.070 (0.034, 0.117) | 0.028 (0.013, 0.047) | 0.283 (-0.625, 1.198) |
| Republic of Cuba | 8.685 (3.680, 15.011) | 0.096 (0.043, 0.168) | 25.072 (12.003, 41.441) | 0.118 (0.057, 0.194) | 1.797 (1.296, 2.301) |
| Commonwealth of Dominica | 0.050 (0.023, 0.087) | 0.095 (0.042, 0.173) | 0.088 (0.039, 0.155) | 0.120 (0.054, 0.216) | 0.684 (0.610, 0.759) |
| Dominican Republic | 1.272 (0.538, 2.211) | 0.048 (0.021, 0.086) | 6.467 (2.887, 12.038) | 0.067 (0.030, 0.125) | 2.376 (1.931, 2.823) |
| Grenada | 0.045 (0.021, 0.075) | 0.054 (0.025, 0.090) | 0.034 (0.016, 0.061) | 0.038 (0.017, 0.068) | -1.074 (-1.318, -0.829) |
| Republic of Guyana | 0.568 (0.260, 0.998) | 0.175 (0.078, 0.305) | 1.089 (0.478, 1.906) | 0.215 (0.095, 0.381) | 1.106 (0.827, 1.385) |
| Republic of Haiti | 0.774 (0.356, 1.331) | 0.039 (0.018, 0.070) | 1.365 (0.603, 2.539) | 0.028 (0.012, 0.051) | -0.638 (-0.818, -0.458) |
| Jamaica | 0.949 (0.427, 1.569) | 0.050 (0.023, 0.083) | 1.377 (0.611, 2.464) | 0.040 (0.018, 0.072) | -0.925 (-1.220, -0.629) |
| Saint Lucia | 0.061 (0.028, 0.108) | 0.094 (0.043, 0.167) | 0.114 (0.055, 0.202) | 0.051 (0.024, 0.090) | -3.293 (-3.820, -2.763) |
| Saint Vincent and the Grenadines | 0.032 (0.014, 0.054) | 0.054 (0.024, 0.094) | 0.089 (0.043, 0.153) | 0.073 (0.035, 0.125) | 1.644 (1.216, 2.074) |
| Republic of Suriname | 0.181 (0.082, 0.311) | 0.079 (0.036, 0.136) | 0.395 (0.174, 0.689) | 0.068 (0.030, 0.120) | -0.101 (-0.395, 0.193) |
| Republic of Trinidad and Tobago | 0.767 (0.358, 1.290) | 0.118 (0.055, 0.195) | 1.732 (0.738, 3.077) | 0.094 (0.041, 0.168) | -0.262 (-0.583, 0.061) |
| Plurinational State of Bolivia | 1.243 (0.522, 2.270) | 0.050 (0.022, 0.090) | 3.588 (1.424, 7.003) | 0.048 (0.019, 0.089) | 0.113 (-0.133, 0.359) |
| Republic of Ecuador | 6.608 (3.236, 10.646) | 0.141 (0.069, 0.226) | 10.351 (4.617, 17.723) | 0.069 (0.031, 0.119) | -2.123 (-2.508, -1.737) |
| Republic of Peru | 1.912 (0.898, 3.209) | 0.018 (0.009, 0.031) | 8.741 (4.075, 15.615) | 0.026 (0.012, 0.047) | 1.140 (0.679, 1.603) |
| Republic of Colombia | 6.539 (3.286, 10.653) | 0.046 (0.022, 0.076) | 18.238 (8.224, 31.175) | 0.032 (0.015, 0.056) | -1.610 (-1.827, -1.393) |
| Republic of Costa Rica | 1.117 (0.522, 1.868) | 0.070 (0.033, 0.117) | 2.417 (1.155, 4.153) | 0.043 (0.021, 0.074) | -2.160 (-2.661, -1.656) |
| Republic of El Salvador | 0.991 (0.450, 1.745) | 0.036 (0.016, 0.064) | 2.039 (0.926, 3.589) | 0.030 (0.014, 0.051) | -0.870 (-1.104, -0.636) |
| Republic of Guatemala | 0.876 (0.384, 1.480) | 0.040 (0.017, 0.069) | 2.050 (0.987, 3.528) | 0.023 (0.011, 0.041) | -2.104 (-2.440, -1.766) |
| Republic of Honduras | 0.655 (0.272, 1.243) | 0.040 (0.017, 0.075) | 3.291 (1.490, 5.836) | 0.066 (0.029, 0.115) | 1.815 (1.558, 2.072) |
| United Mexican States | 54.541 (25.943, 92.939) | 0.165 (0.081, 0.279) | 91.605 (44.566, 150.527) | 0.081 (0.039, 0.134) | -2.403 (-2.542, -2.263) |
| Republic of Nicaragua | 0.211 (0.097, 0.342) | 0.017 (0.008, 0.028) | 0.732 (0.330, 1.286) | 0.018 (0.008, 0.031) | 0.983 (0.560, 1.409) |
| Republic of Panama | 0.530 (0.257, 0.892) | 0.040 (0.019, 0.068) | 1.390 (0.643, 2.470) | 0.030 (0.013, 0.053) | -0.881 (-1.283, -0.478) |
| Bolivarian Republic of Venezuela | 5.482 (2.690, 9.082) | 0.069 (0.034, 0.116) | 12.789 (5.615, 22.465) | 0.047 (0.021, 0.085) | -0.707 (-1.117, -0.295) |
| Federative Republic of Brazil | 103.058 (47.745, 163.259) | 0.148 (0.070, 0.239) | 269.363 (125.313, 427.583) | 0.113 (0.053, 0.180) | -0.464 (-0.693, -0.233) |
| Republic of Paraguay | 1.352 (0.620, 2.314) | 0.070 (0.032, 0.120) | 2.670 (1.180, 4.914) | 0.051 (0.022, 0.094) | -0.617 (-0.952, -0.280) |
| People's Democratic Republic of Algeria | 6.827 (2.940, 12.193) | 0.095 (0.042, 0.164) | 37.834 (15.852, 68.613) | 0.145 (0.063, 0.264) | 1.987 (1.740, 2.235) |
| Kingdom of Bahrain | 0.148 (0.066, 0.253) | 0.147 (0.064, 0.253) | 1.100 (0.474, 1.863) | 0.247 (0.099, 0.434) | 1.542 (1.118, 1.968) |
| Arab Republic of Egypt | 23.099 (10.617, 41.095) | 0.145 (0.067, 0.264) | 88.026 (40.400, 152.254) | 0.201 (0.089, 0.355) | 1.334 (0.902, 1.768) |
| Islamic Republic of Iran | 20.364 (9.523, 34.108) | 0.111 (0.049, 0.194) | 48.762 (22.556, 81.681) | 0.072 (0.033, 0.121) | -2.129 (-2.427, -1.831) |
| Republic of Iraq | 15.007 (6.769, 25.289) | 0.205 (0.092, 0.342) | 16.957 (7.892, 28.858) | 0.097 (0.044, 0.172) | -1.967 (-2.720, -1.208) |
| Hashemite Kingdom of Jordan | 1.283 (0.615, 2.125) | 0.121 (0.058, 0.204) | 6.016 (2.598, 10.993) | 0.116 (0.047, 0.218) | 0.077 (-0.434, 0.591) |
| State of Kuwait | 0.187 (0.089, 0.311) | 0.038 (0.018, 0.065) | 2.359 (1.072, 4.044) | 0.107 (0.047, 0.192) | 4.144 (2.345, 5.973) |
| Lebanese Republic | 1.442 (0.594, 2.673) | 0.080 (0.033, 0.154) | 2.931 (1.300, 5.282) | 0.044 (0.020, 0.080) | -2.455 (-2.973, -1.934) |
| State of Libya | 1.046 (0.441, 1.771) | 0.062 (0.027, 0.107) | 2.387 (1.021, 4.234) | 0.050 (0.022, 0.091) | 0.318 (-0.162, 0.800) |
| Kingdom of Morocco | 12.154 (5.281, 20.207) | 0.100 (0.044, 0.167) | 31.195 (13.706, 55.227) | 0.110 (0.049, 0.198) | 0.383 (0.073, 0.695) |
| Palestine | 0.267 (0.113, 0.469) | 0.040 (0.017, 0.072) | 0.418 (0.212, 0.697) | 0.024 (0.012, 0.040) | -2.049 (-2.194, -1.904) |
| Sultanate of Oman | 0.206 (0.093, 0.352) | 0.039 (0.018, 0.066) | 1.106 (0.494, 1.958) | 0.077 (0.034, 0.140) | 3.233 (2.807, 3.661) |
| State of Qatar | 0.127 (0.057, 0.214) | 0.234 (0.108, 0.398) | 1.243 (0.527, 2.037) | 0.348 (0.152, 0.590) | 1.648 (0.524, 2.785) |
| Kingdom of Saudi Arabia | 12.497 (5.641, 20.983) | 0.247 (0.109, 0.411) | 66.688 (29.161, 114.791) | 0.389 (0.179, 0.674) | 0.887 (0.585, 1.190) |
| Syrian Arab Republic | 4.575 (2.041, 7.812) | 0.106 (0.047, 0.186) | 8.015 (3.549, 14.764) | 0.075 (0.033, 0.134) | -1.705 (-2.085, -1.324) |
| Republic of Tunisia | 3.015 (1.262, 5.340) | 0.077 (0.033, 0.133) | 12.392 (5.079, 22.225) | 0.104 (0.043, 0.191) | 0.903 (0.794, 1.012) |
| Republic of Turkey | 53.577 (25.267, 86.222) | 0.201 (0.092, 0.327) | 140.103 (58.253, 265.117) | 0.171 (0.071, 0.331) | -0.426 (-1.029, 0.180) |
| United Arab Emirates | 1.199 (0.524, 2.034) | 0.354 (0.160, 0.578) | 4.541 (2.003, 7.619) | 0.346 (0.153, 0.595) | 2.157 (1.379, 2.942) |
| Republic of Yemen | 1.361 (0.595, 2.464) | 0.039 (0.017, 0.069) | 3.262 (1.404, 6.000) | 0.030 (0.013, 0.057) | -0.780 (-0.868, -0.692) |
| Islamic Republic of Afghanistan | 2.731 (1.027, 5.088) | 0.047 (0.017, 0.086) | 3.516 (1.485, 6.485) | 0.043 (0.019, 0.079) | 0.394 (-0.366, 1.160) |
| People's Republic of Bangladesh | 4.592 (2.094, 7.956) | 0.012 (0.006, 0.022) | 20.287 (8.367, 36.218) | 0.018 (0.008, 0.033) | 1.477 (1.125, 1.829) |
| Kingdom of Bhutan | 0.016 (0.007, 0.029) | 0.010 (0.004, 0.019) | 0.058 (0.024, 0.105) | 0.011 (0.005, 0.019) | 0.219 (-0.014, 0.453) |
| Republic of India | 111.779 (52.743, 184.919) | 0.032 (0.015, 0.051) | 472.483 (217.018, 785.052) | 0.047 (0.021, 0.077) | 1.124 (0.891, 1.359) |
| Federal Democratic Republic of Nepal | 0.728 (0.323, 1.350) | 0.011 (0.005, 0.019) | 2.741 (1.116, 5.278) | 0.015 (0.006, 0.027) | 0.755 (0.584, 0.927) |
| Islamic Republic of Pakistan | 6.883 (3.187, 12.592) | 0.015 (0.007, 0.026) | 15.140 (6.829, 26.642) | 0.016 (0.007, 0.029) | -0.320 (-0.663, 0.024) |
| Republic of Angola | 0.310 (0.139, 0.540) | 0.013 (0.006, 0.024) | 1.941 (0.855, 3.530) | 0.027 (0.012, 0.051) | 2.629 (2.470, 2.788) |
| Central African Republic | 0.314 (0.136, 0.601) | 0.045 (0.020, 0.080) | 0.509 (0.202, 0.987) | 0.042 (0.016, 0.083) | -0.061 (-0.283, 0.163) |
| Republic of the Congo | 0.213 (0.093, 0.389) | 0.030 (0.013, 0.053) | 0.511 (0.216, 0.880) | 0.030 (0.013, 0.052) | -0.089 (-0.191, 0.013) |
| Democratic Republic of the Congo | 9.375 (3.762, 17.295) | 0.096 (0.043, 0.186) | 9.230 (3.568, 18.408) | 0.041 (0.016, 0.082) | -3.018 (-3.643, -2.390) |
| Republic of Equatorial Guinea | 0.045 (0.018, 0.084) | 0.036 (0.015, 0.067) | 0.622 (0.254, 1.297) | 0.182 (0.070, 0.375) | 6.836 (6.106, 7.571) |
| Gabonese Republic | 0.294 (0.127, 0.574) | 0.066 (0.028, 0.124) | 0.787 (0.344, 1.425) | 0.111 (0.048, 0.204) | 1.249 (0.784, 1.716) |
| Republic of Burundi | 0.408 (0.176, 0.779) | 0.023 (0.010, 0.042) | 0.458 (0.190, 0.877) | 0.015 (0.006, 0.028) | -1.872 (-2.134, -1.609) |
| Union of the Comoros | 0.033 (0.015, 0.058) | 0.025 (0.011, 0.045) | 0.072 (0.030, 0.127) | 0.019 (0.008, 0.034) | -1.229 (-1.461, -0.996) |
| Republic of Djibouti | 0.007 (0.003, 0.013) | 0.009 (0.004, 0.017) | 0.078 (0.036, 0.141) | 0.021 (0.010, 0.038) | 2.888 (2.639, 3.139) |
| State of Eritrea | 0.067 (0.028, 0.129) | 0.012 (0.005, 0.022) | 0.251 (0.120, 0.486) | 0.016 (0.007, 0.031) | 0.671 (0.444, 0.899) |
| Federal Democratic Republic of Ethiopia | 0.829 (0.335, 1.612) | 0.007 (0.003, 0.013) | 3.557 (1.537, 6.757) | 0.011 (0.005, 0.020) | 1.726 (1.547, 1.905) |
| Republic of Kenya | 0.822 (0.364, 1.509) | 0.014 (0.006, 0.025) | 4.188 (1.935, 7.693) | 0.028 (0.013, 0.051) | 2.923 (2.683, 3.163) |
| Republic of Madagascar | 1.111 (0.509, 2.018) | 0.030 (0.014, 0.055) | 1.913 (0.825, 3.524) | 0.029 (0.012, 0.052) | 0.098 (-0.099, 0.295) |
| Republic of Malawi | 0.434 (0.192, 0.785) | 0.017 (0.008, 0.030) | 1.939 (0.870, 3.397) | 0.038 (0.016, 0.068) | 2.883 (2.463, 3.304) |
| Republic of Mauritius | 0.744 (0.339, 1.262) | 0.116 (0.052, 0.194) | 1.404 (0.628, 2.398) | 0.084 (0.038, 0.144) | -2.157 (-2.664, -1.647) |
| Republic of Mozambique | 0.446 (0.209, 0.768) | 0.011 (0.005, 0.018) | 2.299 (1.027, 4.154) | 0.029 (0.013, 0.053) | 4.123 (3.795, 4.451) |
| Republic of Rwanda | 0.284 (0.122, 0.495) | 0.016 (0.007, 0.028) | 0.537 (0.227, 1.017) | 0.014 (0.006, 0.025) | -0.764 (-1.230, -0.295) |
| Republic of Seychelles | 0.018 (0.008, 0.031) | 0.032 (0.014, 0.055) | 0.025 (0.012, 0.044) | 0.025 (0.012, 0.043) | -0.485 (-0.848, -0.120) |
| Federal Republic of Somalia | 0.173 (0.069, 0.341) | 0.013 (0.006, 0.025) | 0.313 (0.130, 0.634) | 0.009 (0.004, 0.019) | -0.665 (-0.769, -0.561) |
| United Republic of Tanzania | 1.370 (0.606, 2.454) | 0.018 (0.008, 0.032) | 5.490 (2.385, 10.047) | 0.030 (0.012, 0.054) | 1.794 (1.590, 1.998) |
| Republic of Uganda | 0.561 (0.241, 0.999) | 0.012 (0.005, 0.023) | 1.321 (0.583, 2.488) | 0.013 (0.006, 0.025) | -0.424 (-0.775, -0.071) |
| Republic of Zambia | 0.399 (0.186, 0.740) | 0.020 (0.010, 0.038) | 1.261 (0.557, 2.333) | 0.028 (0.013, 0.050) | 0.991 (0.593, 1.391) |
| Republic of Botswana | 0.098 (0.043, 0.168) | 0.026 (0.012, 0.046) | 0.250 (0.119, 0.432) | 0.025 (0.012, 0.045) | 0.110 (-0.185, 0.407) |
| Kingdom of Lesotho | 0.195 (0.086, 0.380) | 0.029 (0.013, 0.057) | 0.617 (0.250, 1.166) | 0.079 (0.032, 0.148) | 4.198 (3.540, 4.860) |
| Republic of Namibia | 0.170 (0.075, 0.306) | 0.038 (0.017, 0.068) | 0.340 (0.150, 0.612) | 0.035 (0.016, 0.065) | -0.461 (-0.732, -0.190) |
| Republic of South Africa | 7.722 (3.539, 12.896) | 0.045 (0.021, 0.075) | 28.843 (14.243, 45.764) | 0.082 (0.041, 0.128) | 2.324 (1.803, 2.848) |
| Kingdom of Eswatini | 0.071 (0.032, 0.125) | 0.037 (0.017, 0.065) | 0.163 (0.069, 0.310) | 0.045 (0.020, 0.087) | 0.981 (0.683, 1.280) |
| Republic of Zimbabwe | 0.425 (0.191, 0.733) | 0.016 (0.007, 0.027) | 1.048 (0.464, 1.822) | 0.023 (0.010, 0.040) | 1.926 (1.397, 2.457) |
| Republic of Benin | 0.175 (0.080, 0.310) | 0.011 (0.005, 0.019) | 0.854 (0.383, 1.487) | 0.023 (0.010, 0.040) | 2.818 (2.566, 3.072) |
| Burkina Faso | 0.160 (0.075, 0.289) | 0.005 (0.003, 0.009) | 0.836 (0.374, 1.430) | 0.013 (0.006, 0.022) | 3.431 (2.904, 3.961) |
| Republic of Cameroon | 0.544 (0.245, 0.977) | 0.018 (0.008, 0.032) | 3.525 (1.631, 6.822) | 0.040 (0.019, 0.077) | 3.359 (2.979, 3.741) |
| Republic of Cabo Verde | 0.023 (0.010, 0.041) | 0.010 (0.004, 0.017) | 0.089 (0.041, 0.167) | 0.021 (0.010, 0.039) | 2.485 (2.201, 2.770) |
| Republic of Chad | 0.248 (0.112, 0.476) | 0.011 (0.005, 0.021) | 0.823 (0.361, 1.423) | 0.020 (0.009, 0.035) | 2.207 (1.849, 2.566) |
| Republic of Côte d'Ivoire | 0.710 (0.321, 1.281) | 0.028 (0.013, 0.051) | 3.116 (1.337, 5.547) | 0.039 (0.017, 0.070) | 1.349 (1.107, 1.591) |
| Republic of the Gambia | 0.052 (0.024, 0.094) | 0.020 (0.010, 0.037) | 0.258 (0.105, 0.470) | 0.034 (0.014, 0.063) | 1.893 (1.663, 2.123) |
| Republic of Ghana | 1.003 (0.459, 1.730) | 0.025 (0.012, 0.043) | 16.304 (7.080, 30.068) | 0.145 (0.065, 0.268) | 6.506 (5.976, 7.038) |
| Republic of Guinea | 0.458 (0.220, 0.847) | 0.017 (0.008, 0.032) | 1.338 (0.596, 2.454) | 0.030 (0.013, 0.055) | 2.653 (2.370, 2.938) |
| Republic of Guinea-Bissau | 0.052 (0.023, 0.094) | 0.018 (0.008, 0.032) | 0.106 (0.043, 0.182) | 0.022 (0.009, 0.038) | 0.863 (0.743, 0.984) |
| Republic of Liberia | 0.185 (0.083, 0.335) | 0.020 (0.009, 0.035) | 0.327 (0.142, 0.593) | 0.020 (0.009, 0.035) | 1.016 (0.576, 1.457) |
| Republic of Mali | 0.586 (0.258, 1.113) | 0.020 (0.009, 0.036) | 3.114 (1.241, 5.689) | 0.046 (0.019, 0.081) | 3.439 (2.987, 3.893) |
| Islamic Republic of Mauritania | 0.216 (0.100, 0.375) | 0.028 (0.013, 0.048) | 0.985 (0.431, 1.831) | 0.058 (0.025, 0.107) | 2.525 (2.425, 2.625) |
| Republic of the Niger | 0.265 (0.122, 0.530) | 0.015 (0.007, 0.028) | 1.424 (0.639, 2.713) | 0.026 (0.012, 0.049) | 2.519 (2.116, 2.924) |
| Federal Republic of Nigeria | 4.255 (1.957, 8.305) | 0.013 (0.006, 0.024) | 16.179 (6.801, 28.023) | 0.024 (0.011, 0.042) | 2.328 (1.913, 2.745) |
| Democratic Republic of Sao Tome and Principe | 0.009 (0.004, 0.014) | 0.016 (0.007, 0.027) | 0.032 (0.014, 0.058) | 0.037 (0.016, 0.067) | 3.127 (2.968, 3.287) |
| Republic of Senegal | 0.455 (0.209, 0.775) | 0.018 (0.008, 0.031) | 1.209 (0.550, 2.288) | 0.021 (0.009, 0.039) | 0.411 (0.180, 0.643) |
| Republic of Sierra Leone | 0.198 (0.096, 0.353) | 0.012 (0.006, 0.021) | 0.473 (0.205, 0.862) | 0.016 (0.007, 0.029) | 1.591 (1.339, 1.843) |
| Togolese Republic | 0.113 (0.051, 0.187) | 0.014 (0.006, 0.024) | 0.706 (0.319, 1.268) | 0.030 (0.013, 0.055) | 2.727 (2.307, 3.148) |
| American Samoa | 0.017 (0.007, 0.028) | 0.106 (0.048, 0.176) | 0.049 (0.022, 0.086) | 0.129 (0.058, 0.231) | 0.414 (0.259, 0.569) |
| Bermuda | 0.056 (0.026, 0.095) | 0.106 (0.049, 0.179) | 0.051 (0.023, 0.096) | 0.032 (0.014, 0.060) | -3.581 (-4.099, -3.060) |
| Cook Islands | 0.009 (0.004, 0.016) | 0.094 (0.046, 0.163) | 0.034 (0.016, 0.062) | 0.136 (0.061, 0.244) | 0.927 (0.777, 1.077) |
| Greenland | 0.029 (0.013, 0.051) | 0.147 (0.065, 0.254) | 0.034 (0.018, 0.060) | 0.077 (0.038, 0.133) | -2.074 (-2.159, -1.989) |
| Guam | 0.114 (0.051, 0.192) | 0.244 (0.110, 0.420) | 0.156 (0.073, 0.267) | 0.073 (0.035, 0.122) | -3.231 (-3.554, -2.908) |
| Principality of Monaco | 0.911 (0.413, 1.536) | 1.055 (0.477, 1.779) | 0.651 (0.291, 1.137) | 0.498 (0.225, 0.861) | -2.633 (-2.896, -2.371) |
| Republic of Nauru | 0.005 (0.002, 0.009) | 0.144 (0.063, 0.246) | 0.007 (0.003, 0.011) | 0.148 (0.063, 0.260) | -0.160 (-0.890, 0.577) |
| Republic of Niue | 0.002 (0.001, 0.003) | 0.078 (0.034, 0.143) | 0.003 (0.001, 0.006) | 0.156 (0.073, 0.271) | 2.346 (2.227, 2.465) |
| Northern Mariana Islands | 0.026 (0.012, 0.046) | 0.282 (0.132, 0.519) | 0.040 (0.018, 0.071) | 0.127 (0.059, 0.219) | -3.282 (-3.603, -2.960) |
| Republic of Palau | 0.010 (0.004, 0.018) | 0.134 (0.056, 0.238) | 0.029 (0.012, 0.050) | 0.191 (0.084, 0.340) | 1.326 (1.223, 1.429) |
| Puerto Rico | 1.385 (0.624, 2.610) | 0.044 (0.020, 0.081) | 1.865 (0.813, 3.303) | 0.021 (0.009, 0.038) | -2.547 (-2.770, -2.322) |
| Saint Kitts and Nevis | 0.043 (0.019, 0.077) | 0.136 (0.063, 0.247) | 0.034 (0.015, 0.057) | 0.069 (0.030, 0.120) | -2.145 (-2.563, -1.724) |
| Republic of San Marino | 0.117 (0.052, 0.195) | 0.306 (0.136, 0.514) | 0.098 (0.037, 0.178) | 0.086 (0.031, 0.158) | -3.437 (-3.794, -3.079) |
| Tokelau | 0.001 (0.000, 0.001) | 0.061 (0.027, 0.101) | 0.001 (0.001, 0.003) | 0.097 (0.041, 0.177) | 1.692 (1.606, 1.778) |
| Tuvalu | 0.001 (0.001, 0.002) | 0.024 (0.012, 0.042) | 0.002 (0.001, 0.004) | 0.029 (0.013, 0.049) | 0.199 (0.015, 0.383) |
| United States Virgin Islands | 0.036 (0.017, 0.060) | 0.061 (0.030, 0.105) | 0.106 (0.047, 0.202) | 0.061 (0.028, 0.106) | 0.144 (-0.174, 0.464) |
| Republic of South Sudan | 0.699 (0.304, 1.266) | 0.036 (0.016, 0.067) | 1.030 (0.460, 1.969) | 0.040 (0.018, 0.076) | 0.451 (0.263, 0.640) |
| Republic of Sudan | 2.965 (1.233, 5.453) | 0.039 (0.017, 0.070) | 6.639 (2.729, 11.992) | 0.040 (0.017, 0.070) | -0.010 (-0.146, 0.126) |

TABLE S2. DALYs number, and ASMR of ischemic stroke attributed to diet high in sugar-sweetened beverages in 1990 and 2021, and and its temporal trends from 1990 to 2021

| Location | 1990 | | 2021 | | EAPC_95%CI |
| --- | --- | --- | --- | --- | --- |
| Number_95%UI | ASR | Number_95%UI | ASR |
| People's Republic of China | 3432.528 (1611.509, 5590.174) | 0.477 (0.220, 0.776) | 33223.746 (16364.564, 52972.423) | 1.627 (0.793, 2.622) | 4.501 (4.303, 4.700) |
| Democratic People's Republic of Korea | 78.239 (35.481, 133.708) | 0.543 (0.246, 0.924) | 156.373 (61.394, 270.662) | 0.486 (0.192, 0.840) | -0.416 (-0.650, -0.182) |
| Taiwan (Province of China) | 205.366 (98.737, 340.846) | 1.530 (0.756, 2.565) | 336.674 (161.363, 557.683) | 0.816 (0.396, 1.362) | -2.091 (-2.461, -1.719) |
| Kingdom of Cambodia | 9.804 (4.639, 16.640) | 0.286 (0.138, 0.497) | 40.907 (17.866, 74.709) | 0.411 (0.185, 0.737) | 1.323 (1.125, 1.522) |
| Republic of Indonesia | 224.520 (107.534, 357.209) | 0.277 (0.134, 0.451) | 1127.844 (524.385, 1887.766) | 0.545 (0.256, 0.897) | 2.381 (2.079, 2.683) |
| Lao People's Democratic Republic | 9.778 (4.655, 17.244) | 0.535 (0.257, 0.926) | 26.504 (12.028, 43.873) | 0.638 (0.284, 1.053) | 0.674 (0.560, 0.789) |
| Malaysia | 121.207 (56.169, 196.474) | 1.374 (0.652, 2.189) | 563.481 (252.875, 906.085) | 2.009 (0.896, 3.251) | 1.442 (0.911, 1.975) |
| Republic of Maldives | 0.435 (0.201, 0.768) | 0.560 (0.270, 0.953) | 1.036 (0.475, 1.772) | 0.309 (0.133, 0.527) | -2.237 (-2.451, -2.023) |
| Republic of the Union of Myanmar | 90.131 (41.575, 152.592) | 0.419 (0.197, 0.698) | 348.198 (153.031, 615.387) | 0.757 (0.337, 1.354) | 2.568 (2.331, 2.805) |
| Republic of the Philippines | 152.373 (74.834, 243.434) | 0.578 (0.284, 0.936) | 875.269 (413.258, 1360.812) | 1.092 (0.514, 1.719) | 2.379 (2.302, 2.457) |
| Democratic Socialist Republic of Sri Lanka | 55.075 (27.486, 89.698) | 0.585 (0.284, 0.942) | 242.419 (105.846, 426.849) | 0.983 (0.438, 1.719) | 2.365 (2.114, 2.618) |
| Kingdom of Thailand | 241.934 (120.077, 410.991) | 0.726 (0.352, 1.218) | 1398.006 (671.052, 2273.324) | 1.330 (0.643, 2.157) | 1.549 (1.262, 1.838) |
| Democratic Republic of Timor-Leste | 0.512 (0.228, 0.868) | 0.247 (0.111, 0.421) | 1.796 (0.785, 3.076) | 0.231 (0.102, 0.392) | 0.314 (-0.133, 0.764) |
| Socialist Republic of Viet Nam | 78.113 (37.522, 128.458) | 0.213 (0.102, 0.352) | 454.525 (208.187, 756.261) | 0.504 (0.233, 0.825) | 3.551 (3.291, 3.811) |
| Republic of Fiji | 5.371 (2.451, 9.231) | 1.519 (0.706, 2.684) | 20.438 (8.680, 35.722) | 3.063 (1.384, 5.415) | 1.574 (1.130, 2.021) |
| Republic of Kiribati | 0.488 (0.223, 0.832) | 1.336 (0.620, 2.345) | 1.460 (0.706, 2.470) | 2.153 (1.040, 3.707) | 1.780 (1.653, 1.907) |
| Republic of the Marshall Islands | 0.177 (0.086, 0.299) | 1.069 (0.521, 1.817) | 0.436 (0.215, 0.735) | 1.341 (0.641, 2.244) | 0.624 (0.563, 0.685) |
| Federated States of Micronesia | 0.616 (0.297, 1.104) | 1.257 (0.605, 2.201) | 0.845 (0.389, 1.523) | 1.112 (0.541, 1.924) | -0.576 (-0.648, -0.505) |
| Independent State of Papua New Guinea | 7.365 (3.156, 13.556) | 0.472 (0.202, 0.880) | 14.480 (6.550, 25.801) | 0.324 (0.143, 0.567) | -1.748 (-2.024, -1.471) |
| Independent State of Samoa | 1.279 (0.609, 2.241) | 1.520 (0.713, 2.655) | 3.729 (1.754, 6.478) | 2.684 (1.278, 4.622) | 2.384 (2.201, 2.567) |
| Solomon Islands | 0.423 (0.197, 0.738) | 0.361 (0.161, 0.632) | 1.138 (0.544, 1.995) | 0.358 (0.170, 0.626) | -0.452 (-0.625, -0.278) |
| Kingdom of Tonga | 0.301 (0.137, 0.518) | 0.549 (0.254, 0.925) | 0.694 (0.298, 1.204) | 0.870 (0.374, 1.506) | 1.311 (1.196, 1.425) |
| Republic of Vanuatu | 0.757 (0.347, 1.319) | 1.300 (0.607, 2.205) | 2.085 (0.899, 3.781) | 1.181 (0.527, 2.069) | -0.604 (-0.834, -0.373) |
| Republic of Armenia | 10.413 (5.100, 16.955) | 0.415 (0.204, 0.669) | 27.595 (12.885, 44.344) | 0.642 (0.303, 1.027) | 1.772 (1.255, 2.292) |
| Republic of Azerbaijan | 30.898 (14.064, 55.325) | 0.655 (0.294, 1.180) | 130.301 (58.806, 229.271) | 1.369 (0.601, 2.381) | 4.297 (3.447, 5.154) |
| Georgia | 55.502 (27.143, 98.966) | 0.930 (0.452, 1.688) | 89.328 (42.651, 148.349) | 1.465 (0.711, 2.453) | 2.278 (1.584, 2.977) |
| Republic of Kazakhstan | 491.865 (228.427, 874.458) | 4.173 (1.930, 7.287) | 557.485 (253.710, 915.941) | 3.461 (1.605, 5.592) | -0.665 (-1.053, -0.275) |
| Kyrgyz Republic | 71.005 (31.848, 118.056) | 2.491 (1.136, 4.159) | 95.903 (41.532, 167.953) | 1.954 (0.835, 3.380) | -0.755 (-0.966, -0.543) |
| Mongolia | 5.003 (2.241, 8.923) | 0.481 (0.220, 0.851) | 22.466 (10.356, 36.587) | 0.960 (0.429, 1.595) | 2.803 (2.408, 3.199) |
| Republic of Tajikistan | 22.586 (10.609, 38.463) | 0.862 (0.394, 1.471) | 36.047 (14.241, 64.836) | 0.704 (0.275, 1.250) | -0.388 (-0.774, -0.001) |
| Turkmenistan | 40.052 (17.642, 69.775) | 2.113 (0.933, 3.650) | 316.487 (147.729, 546.574) | 7.770 (3.596, 13.075) | 5.372 (4.702, 6.047) |
| Republic of Uzbekistan | 139.397 (64.725, 231.915) | 1.215 (0.574, 2.073) | 360.604 (162.787, 611.141) | 1.385 (0.619, 2.304) | 0.267 (-0.134, 0.670) |
| Republic of Albania | 51.279 (23.274, 88.908) | 2.924 (1.327, 5.051) | 204.130 (92.681, 350.859) | 4.817 (2.232, 8.291) | 2.819 (2.260, 3.381) |
| Bosnia and Herzegovina | 157.091 (75.474, 275.299) | 4.346 (2.088, 7.602) | 306.697 (136.074, 567.976) | 4.953 (2.192, 8.810) | 0.485 (0.298, 0.672) |
| Republic of Bulgaria | 2087.083 (1029.323, 3294.872) | 19.344 (9.519, 30.229) | 1696.735 (733.642, 2838.759) | 11.751 (5.176, 19.635) | -0.878 (-1.746, -0.002) |
| Republic of Croatia | 466.385 (228.007, 751.300) | 8.633 (4.114, 14.116) | 437.418 (197.376, 746.435) | 4.559 (2.090, 7.681) | -1.482 (-1.875, -1.088) |
| Czech Republic | 1598.721 (685.511, 2612.580) | 11.547 (5.106, 19.225) | 618.604 (290.053, 1065.767) | 2.797 (1.335, 4.716) | -4.869 (-5.253, -4.483) |
| Hungary | 1106.903 (518.685, 1714.052) | 7.729 (3.566, 11.740) | 526.376 (236.549, 867.081) | 2.787 (1.244, 4.581) | -3.132 (-3.520, -2.741) |
| North Macedonia | 136.156 (59.961, 233.402) | 8.222 (3.612, 14.117) | 253.782 (116.043, 458.964) | 9.181 (4.307, 16.388) | 0.595 (0.441, 0.750) |
| Montenegro | 13.725 (5.980, 23.779) | 2.362 (1.020, 4.091) | 22.179 (9.791, 40.346) | 2.546 (1.101, 4.567) | 1.151 (0.462, 1.846) |
| Republic of Poland | 3548.435 (1603.065, 5720.162) | 8.566 (3.852, 13.928) | 3525.332 (1724.113, 5790.533) | 4.825 (2.361, 7.881) | -1.865 (-2.013, -1.716) |
| Romania | 2038.261 (986.444, 3330.848) | 8.375 (4.050, 13.795) | 5389.311 (2675.337, 8537.184) | 13.502 (6.700, 21.307) | 1.726 (1.433, 2.021) |
| Republic of Serbia | 1067.829 (487.309, 1790.797) | 12.035 (5.501, 20.636) | 815.948 (394.021, 1469.082) | 4.778 (2.326, 8.516) | -3.318 (-3.647, -2.989) |
| Slovak Republic | 402.213 (202.640, 655.840) | 6.853 (3.403, 11.041) | 443.595 (194.472, 718.238) | 4.591 (2.016, 7.377) | -1.275 (-1.839, -0.708) |
| Republic of Slovenia | 140.987 (63.973, 252.802) | 5.715 (2.605, 10.066) | 144.742 (61.778, 228.582) | 2.887 (1.250, 4.636) | -1.920 (-2.094, -1.746) |
| Republic of Belarus | 155.233 (69.745, 262.220) | 1.207 (0.534, 2.013) | 177.338 (75.824, 309.560) | 1.088 (0.471, 1.912) | -0.754 (-0.943, -0.565) |
| Republic of Estonia | 66.536 (30.908, 118.106) | 3.247 (1.513, 5.763) | 39.372 (18.102, 65.303) | 1.415 (0.659, 2.310) | -3.637 (-4.122, -3.150) |
| Republic of Latvia | 123.298 (57.429, 210.192) | 3.440 (1.610, 5.814) | 103.527 (46.870, 186.889) | 2.391 (1.099, 4.200) | -1.127 (-1.584, -0.668) |
| Republic of Lithuania | 112.107 (51.227, 187.307) | 2.496 (1.138, 4.174) | 167.360 (74.934, 291.232) | 2.700 (1.227, 4.588) | 0.753 (0.398, 1.110) |
| Republic of Moldova | 28.267 (13.343, 47.344) | 0.722 (0.343, 1.223) | 49.077 (22.009, 84.708) | 0.809 (0.369, 1.376) | 1.220 (0.590, 1.854) |
| Russian Federation | 6078.349 (2913.827, 9809.522) | 3.558 (1.715, 5.709) | 8435.450 (4035.030, 13255.252) | 3.518 (1.665, 5.509) | 0.031 (-0.283, 0.346) |
| Ukraine | 1245.625 (607.700, 2024.764) | 1.800 (0.878, 2.976) | 856.223 (409.918, 1428.389) | 1.086 (0.521, 1.784) | -1.407 (-1.847, -0.966) |
| Brunei Darussalam | 1.473 (0.691, 2.480) | 1.506 (0.690, 2.578) | 2.989 (1.312, 5.180) | 0.987 (0.482, 1.739) | -1.257 (-1.381, -1.131) |
| Japan | 6060.038 (2934.633, 9540.666) | 3.850 (1.842, 6.047) | 6247.099 (3121.456, 10274.398) | 1.435 (0.706, 2.353) | -3.514 (-3.755, -3.273) |
| Republic of Korea | 690.405 (331.582, 1102.839) | 2.835 (1.319, 4.589) | 1325.293 (634.871, 2227.960) | 1.460 (0.698, 2.431) | -2.641 (-3.040, -2.239) |
| Republic of Singapore | 46.311 (22.507, 74.830) | 2.275 (1.076, 3.679) | 76.073 (37.963, 125.770) | 0.905 (0.442, 1.519) | -2.918 (-3.090, -2.744) |
| Australia | 861.170 (410.035, 1403.259) | 4.535 (2.151, 7.428) | 1001.781 (494.262, 1591.282) | 2.042 (1.009, 3.200) | -2.546 (-2.780, -2.310) |
| New Zealand | 125.152 (59.041, 209.837) | 3.237 (1.515, 5.349) | 154.986 (77.272, 252.281) | 1.745 (0.869, 2.810) | -2.194 (-2.521, -1.866) |
| Principality of Andorra | 1.668 (0.767, 2.760) | 3.241 (1.473, 5.332) | 2.482 (1.071, 4.428) | 1.510 (0.660, 2.670) | -2.153 (-2.300, -2.006) |
| Republic of Austria | 309.613 (138.600, 507.406) | 2.475 (1.109, 4.066) | 305.351 (149.322, 496.407) | 1.476 (0.715, 2.376) | -1.894 (-2.035, -1.753) |
| Kingdom of Belgium | 609.428 (282.642, 1029.268) | 3.872 (1.800, 6.441) | 467.910 (224.102, 790.387) | 1.761 (0.821, 2.951) | -2.496 (-2.563, -2.428) |
| Republic of Cyprus | 15.621 (7.674, 28.861) | 2.814 (1.352, 5.170) | 11.976 (5.289, 19.948) | 0.728 (0.304, 1.256) | -4.716 (-5.010, -4.421) |
| Kingdom of Denmark | 188.985 (86.953, 317.408) | 2.172 (1.003, 3.611) | 175.886 (82.172, 300.113) | 1.348 (0.631, 2.278) | -1.892 (-2.260, -1.522) |
| Republic of Finland | 294.209 (135.696, 484.071) | 4.066 (1.874, 6.782) | 185.321 (87.698, 320.536) | 1.327 (0.636, 2.263) | -3.169 (-3.434, -2.904) |
| French Republic | 1808.188 (852.411, 2953.687) | 2.057 (0.962, 3.347) | 1746.284 (828.136, 2921.452) | 1.075 (0.511, 1.716) | -2.023 (-2.176, -1.870) |
| Federal Republic of Germany | 4138.857 (1990.306, 7001.707) | 3.162 (1.483, 5.352) | 2389.392 (1061.456, 3944.261) | 1.159 (0.527, 1.869) | -3.073 (-3.253, -2.893) |
| Hellenic Republic | 931.486 (460.573, 1527.952) | 6.428 (3.182, 10.404) | 598.369 (289.701, 1098.819) | 1.872 (0.932, 3.251) | -4.579 (-4.853, -4.303) |
| Republic of Iceland | 10.570 (5.471, 18.057) | 3.504 (1.796, 5.963) | 7.169 (3.291, 11.514) | 1.129 (0.524, 1.843) | -3.384 (-3.680, -3.088) |
| Ireland | 184.117 (91.886, 302.799) | 4.632 (2.206, 7.593) | 132.338 (58.109, 212.040) | 1.614 (0.718, 2.580) | -3.461 (-3.731, -3.191) |
| State of Israel | 133.140 (62.797, 217.744) | 2.905 (1.386, 4.684) | 146.921 (67.736, 258.052) | 1.117 (0.523, 1.923) | -3.689 (-3.913, -3.464) |
| Republic of Italy | 2737.454 (1175.838, 4525.875) | 3.116 (1.364, 5.241) | 2217.759 (975.856, 3885.367) | 1.164 (0.530, 1.954) | -3.471 (-3.653, -3.289) |
| Grand Duchy of Luxembourg | 37.113 (16.863, 60.493) | 6.707 (3.063, 10.875) | 8.797 (4.088, 14.900) | 0.798 (0.379, 1.359) | -6.744 (-6.887, -6.601) |
| Republic of Malta | 21.580 (10.160, 35.605) | 5.180 (2.451, 8.461) | 11.601 (5.287, 18.915) | 1.154 (0.527, 1.878) | -5.284 (-5.855, -4.710) |
| Kingdom of the Netherlands | 606.530 (285.355, 976.178) | 2.963 (1.409, 4.729) | 638.904 (307.130, 1092.306) | 1.727 (0.824, 2.917) | -2.168 (-2.420, -1.916) |
| Kingdom of Norway | 297.229 (148.609, 493.325) | 3.915 (1.952, 6.575) | 187.073 (89.264, 309.393) | 1.662 (0.787, 2.708) | -3.087 (-3.333, -2.840) |
| Portuguese Republic | 1053.802 (472.445, 1782.026) | 8.236 (3.799, 13.606) | 483.038 (225.673, 820.348) | 1.627 (0.762, 2.649) | -6.215 (-6.573, -5.855) |
| Kingdom of Spain | 1760.971 (841.910, 3043.072) | 3.324 (1.607, 5.705) | 1227.755 (569.014, 2098.658) | 1.129 (0.530, 1.903) | -3.783 (-4.187, -3.376) |
| Kingdom of Sweden | 292.345 (141.087, 490.303) | 1.773 (0.843, 2.947) | 273.476 (119.526, 461.014) | 1.146 (0.514, 1.931) | -1.516 (-1.833, -1.199) |
| Swiss Confederation | 187.383 (93.587, 306.024) | 1.660 (0.822, 2.744) | 107.956 (46.852, 187.333) | 0.518 (0.228, 0.894) | -3.498 (-3.798, -3.197) |
| United Kingdom of Great Britain and Northern Ireland | 1525.726 (738.023, 2488.625) | 1.590 (0.784, 2.579) | 818.048 (392.638, 1348.227) | 0.585 (0.282, 0.981) | -3.570 (-3.883, -3.255) |
| Argentine Republic | 1609.667 (793.927, 2548.219) | 5.274 (2.571, 8.442) | 1883.071 (945.406, 3024.900) | 3.296 (1.649, 5.279) | -1.194 (-1.313, -1.076) |
| Republic of Chile | 279.014 (140.120, 466.088) | 3.011 (1.521, 4.961) | 533.786 (248.679, 863.120) | 2.086 (0.965, 3.401) | -1.203 (-1.431, -0.975) |
| Eastern Republic of Uruguay | 160.829 (69.799, 268.033) | 4.138 (1.796, 6.853) | 183.274 (84.027, 300.727) | 3.126 (1.419, 5.136) | -1.112 (-1.387, -0.837) |
| Canada | 352.181 (165.002, 598.933) | 1.085 (0.513, 1.835) | 618.522 (304.175, 1009.930) | 0.874 (0.420, 1.437) | -1.171 (-1.616, -0.724) |
| United States of America | 11702.184 (5323.199, 18703.204) | 3.530 (1.601, 5.597) | 16802.133 (8103.693, 26164.790) | 3.079 (1.472, 4.873) | -1.417 (-1.808, -1.023) |
| Antigua and Barbuda | 0.245 (0.117, 0.410) | 0.433 (0.205, 0.728) | 0.340 (0.156, 0.579) | 0.353 (0.164, 0.599) | -0.668 (-1.037, -0.296) |
| Commonwealth of the Bahamas | 1.207 (0.572, 2.023) | 0.823 (0.386, 1.398) | 2.009 (0.889, 3.571) | 0.518 (0.232, 0.915) | -1.240 (-1.410, -1.069) |
| Barbados | 10.595 (4.936, 19.105) | 3.644 (1.732, 6.313) | 9.638 (4.459, 17.347) | 1.919 (0.884, 3.320) | -2.136 (-2.381, -1.891) |
| Belize | 0.353 (0.154, 0.579) | 0.377 (0.163, 0.622) | 1.534 (0.737, 2.537) | 0.525 (0.248, 0.860) | 0.492 (-0.367, 1.357) |
| Republic of Cuba | 165.123 (73.967, 272.823) | 1.686 (0.762, 2.777) | 471.287 (241.870, 769.866) | 2.406 (1.229, 3.949) | 2.375 (1.866, 2.886) |
| Commonwealth of Dominica | 0.821 (0.385, 1.436) | 1.473 (0.676, 2.605) | 1.588 (0.734, 2.754) | 2.043 (0.942, 3.495) | 1.042 (0.952, 1.131) |
| Dominican Republic | 25.262 (11.556, 41.957) | 0.781 (0.343, 1.313) | 141.531 (62.361, 248.290) | 1.414 (0.620, 2.495) | 3.089 (2.699, 3.481) |
| Grenada | 0.757 (0.360, 1.227) | 0.999 (0.472, 1.607) | 0.722 (0.339, 1.239) | 0.702 (0.324, 1.205) | -1.037 (-1.289, -0.784) |
| Republic of Guyana | 13.646 (6.339, 23.428) | 3.688 (1.742, 6.340) | 23.743 (10.817, 41.941) | 4.061 (1.814, 7.069) | 0.716 (0.469, 0.964) |
| Republic of Haiti | 17.377 (7.955, 28.998) | 0.661 (0.305, 1.111) | 32.113 (14.769, 57.564) | 0.505 (0.226, 0.925) | -0.417 (-0.605, -0.228) |
| Jamaica | 15.712 (7.229, 25.980) | 0.847 (0.393, 1.389) | 22.095 (10.190, 37.729) | 0.689 (0.322, 1.170) | -0.826 (-1.109, -0.542) |
| Saint Lucia | 1.093 (0.491, 1.814) | 1.432 (0.653, 2.360) | 1.966 (0.934, 3.399) | 0.853 (0.406, 1.446) | -2.647 (-3.071, -2.222) |
| Saint Vincent and the Grenadines | 0.576 (0.275, 0.957) | 0.871 (0.425, 1.463) | 1.665 (0.832, 2.790) | 1.274 (0.635, 2.137) | 1.895 (1.527, 2.265) |
| Republic of Suriname | 4.102 (1.898, 6.979) | 1.621 (0.759, 2.774) | 9.135 (4.031, 15.604) | 1.485 (0.652, 2.557) | 0.016 (-0.266, 0.299) |
| Republic of Trinidad and Tobago | 16.321 (7.655, 27.270) | 2.093 (0.983, 3.493) | 34.847 (15.506, 59.670) | 1.857 (0.834, 3.171) | -0.004 (-0.251, 0.245) |
| Plurinational State of Bolivia | 28.324 (11.611, 51.907) | 0.954 (0.406, 1.737) | 85.634 (35.615, 159.741) | 0.976 (0.401, 1.824) | 0.280 (0.028, 0.532) |
| Republic of Ecuador | 163.602 (85.667, 260.089) | 3.105 (1.600, 4.922) | 260.139 (121.099, 435.098) | 1.614 (0.746, 2.703) | -1.997 (-2.422, -1.571) |
| Republic of Peru | 37.783 (18.245, 62.087) | 0.335 (0.159, 0.552) | 194.453 (91.205, 337.629) | 0.575 (0.270, 0.999) | 1.896 (1.385, 2.410) |
| Republic of Colombia | 143.688 (69.212, 229.141) | 0.873 (0.420, 1.402) | 405.528 (187.003, 684.795) | 0.730 (0.337, 1.234) | -1.070 (-1.374, -0.766) |
| Republic of Costa Rica | 23.163 (10.738, 38.761) | 1.345 (0.625, 2.257) | 51.562 (24.405, 86.915) | 0.933 (0.445, 1.569) | -1.700 (-2.111, -1.288) |
| Republic of El Salvador | 21.083 (9.526, 37.049) | 0.717 (0.322, 1.267) | 41.372 (18.774, 68.763) | 0.642 (0.289, 1.078) | -0.669 (-0.895, -0.443) |
| Republic of Guatemala | 21.008 (9.009, 33.739) | 0.709 (0.307, 1.162) | 46.068 (22.941, 76.472) | 0.439 (0.217, 0.733) | -1.945 (-2.283, -1.605) |
| Republic of Honduras | 15.293 (6.488, 27.186) | 0.776 (0.329, 1.407) | 70.226 (30.968, 122.029) | 1.193 (0.529, 2.055) | 1.581 (1.386, 1.777) |
| United Mexican States | 1324.682 (619.256, 2098.484) | 3.228 (1.516, 5.304) | 2255.422 (1078.426, 3653.291) | 1.814 (0.875, 2.949) | -2.028 (-2.175, -1.881) |
| Republic of Nicaragua | 4.787 (2.238, 7.890) | 0.325 (0.149, 0.540) | 17.794 (8.258, 31.035) | 0.372 (0.173, 0.657) | 1.117 (0.759, 1.476) |
| Republic of Panama | 10.346 (5.051, 17.820) | 0.722 (0.348, 1.234) | 26.415 (12.959, 45.630) | 0.584 (0.287, 0.999) | -0.616 (-1.071, -0.159) |
| Bolivarian Republic of Venezuela | 119.142 (59.210, 196.246) | 1.300 (0.638, 2.150) | 242.028 (108.913, 411.384) | 0.856 (0.384, 1.457) | -0.991 (-1.400, -0.580) |
| Federative Republic of Brazil | 2250.883 (1043.810, 3587.770) | 2.748 (1.285, 4.373) | 5329.304 (2518.533, 8351.399) | 2.165 (1.023, 3.394) | -0.528 (-0.722, -0.334) |
| Republic of Paraguay | 24.708 (11.350, 41.342) | 1.194 (0.535, 2.003) | 52.409 (23.147, 95.612) | 0.935 (0.411, 1.734) | -0.582 (-0.860, -0.304) |
| People's Democratic Republic of Algeria | 167.090 (72.672, 291.489) | 1.657 (0.764, 2.827) | 879.930 (379.428, 1528.367) | 2.679 (1.162, 4.648) | 2.018 (1.790, 2.246) |
| Kingdom of Bahrain | 4.539 (2.045, 7.775) | 2.731 (1.252, 4.597) | 30.521 (13.510, 50.646) | 4.311 (1.790, 7.246) | 1.293 (0.937, 1.650) |
| Arab Republic of Egypt | 483.270 (223.129, 868.163) | 2.355 (1.092, 4.137) | 2262.773 (1045.271, 3817.076) | 3.949 (1.804, 6.717) | 1.852 (1.465, 2.240) |
| Islamic Republic of Iran | 531.205 (241.874, 889.434) | 2.210 (1.037, 3.656) | 1250.382 (589.885, 2133.030) | 1.577 (0.746, 2.669) | -1.759 (-2.048, -1.469) |
| Republic of Iraq | 363.380 (166.428, 621.167) | 4.547 (2.057, 7.874) | 440.811 (202.587, 751.324) | 1.887 (0.901, 3.200) | -2.260 (-2.914, -1.601) |
| Hashemite Kingdom of Jordan | 36.001 (17.613, 59.535) | 2.698 (1.316, 4.491) | 169.255 (79.767, 300.092) | 2.386 (1.075, 4.236) | -0.274 (-0.766, 0.221) |
| State of Kuwait | 7.563 (3.535, 12.668) | 0.961 (0.459, 1.642) | 77.908 (36.584, 132.033) | 2.400 (1.057, 4.154) | 3.696 (2.139, 5.277) |
| Lebanese Republic | 35.262 (14.799, 61.658) | 1.687 (0.708, 3.014) | 64.753 (30.717, 109.720) | 1.038 (0.493, 1.758) | -2.027 (-2.535, -1.517) |
| State of Libya | 27.333 (11.645, 46.255) | 1.399 (0.606, 2.348) | 75.859 (30.946, 129.194) | 1.257 (0.530, 2.198) | 0.577 (0.072, 1.085) |
| Kingdom of Morocco | 269.313 (123.387, 446.835) | 1.968 (0.898, 3.251) | 764.884 (327.443, 1295.785) | 2.297 (1.006, 3.917) | 0.556 (0.275, 0.838) |
| Palestine | 5.412 (2.300, 9.519) | 0.690 (0.291, 1.198) | 10.284 (5.182, 16.957) | 0.439 (0.224, 0.725) | -1.908 (-2.050, -1.767) |
| Sultanate of Oman | 5.437 (2.442, 8.991) | 0.811 (0.364, 1.392) | 39.792 (17.887, 70.284) | 1.673 (0.764, 2.925) | 3.346 (2.955, 3.740) |
| State of Qatar | 4.854 (2.283, 7.859) | 4.513 (2.024, 7.441) | 53.650 (23.632, 93.634) | 6.272 (2.876, 10.336) | 1.550 (0.564, 2.545) |
| Kingdom of Saudi Arabia | 384.958 (174.156, 633.870) | 5.682 (2.524, 9.332) | 2723.824 (1188.102, 4590.298) | 9.358 (4.276, 16.262) | 1.080 (0.779, 1.382) |
| Syrian Arab Republic | 115.758 (50.229, 195.562) | 2.222 (0.974, 3.833) | 216.447 (98.791, 386.450) | 1.671 (0.745, 2.932) | -1.420 (-1.781, -1.059) |
| Republic of Tunisia | 73.228 (30.998, 125.431) | 1.547 (0.652, 2.620) | 290.101 (119.924, 511.398) | 2.243 (0.932, 3.972) | 1.166 (1.075, 1.256) |
| Republic of Turkey | 1167.152 (548.825, 1841.317) | 3.717 (1.780, 5.850) | 2977.207 (1290.565, 5208.246) | 3.337 (1.424, 5.915) | -0.375 (-0.872, 0.124) |
| United Arab Emirates | 51.640 (24.046, 85.579) | 8.280 (3.724, 13.425) | 247.841 (118.483, 399.177) | 6.776 (3.200, 11.406) | 0.882 (0.330, 1.438) |
| Republic of Yemen | 32.251 (14.302, 59.553) | 0.744 (0.325, 1.319) | 80.805 (36.159, 142.030) | 0.600 (0.268, 1.098) | -0.583 (-0.704, -0.461) |
| Islamic Republic of Afghanistan | 69.470 (26.794, 134.173) | 1.038 (0.410, 1.922) | 103.498 (42.280, 192.288) | 0.970 (0.404, 1.797) | 0.585 (-0.172, 1.348) |
| People's Republic of Bangladesh | 97.624 (45.635, 168.001) | 0.228 (0.105, 0.394) | 430.613 (179.143, 766.946) | 0.335 (0.139, 0.593) | 1.577 (1.347, 1.807) |
| Kingdom of Bhutan | 0.387 (0.166, 0.718) | 0.192 (0.083, 0.344) | 1.208 (0.554, 2.124) | 0.209 (0.094, 0.370) | 0.226 (-0.019, 0.472) |
| Republic of India | 2960.804 (1389.708, 4859.704) | 0.687 (0.325, 1.125) | 11825.218 (5582.690, 19749.409) | 1.020 (0.479, 1.689) | 1.092 (0.860, 1.325) |
| Federal Democratic Republic of Nepal | 16.497 (7.506, 28.981) | 0.208 (0.094, 0.380) | 60.972 (25.799, 116.508) | 0.282 (0.118, 0.518) | 0.838 (0.662, 1.014) |
| Islamic Republic of Pakistan | 160.792 (77.154, 284.894) | 0.304 (0.147, 0.536) | 407.571 (178.651, 716.979) | 0.352 (0.159, 0.609) | -0.151 (-0.474, 0.173) |
| Republic of Angola | 8.374 (3.936, 14.383) | 0.270 (0.125, 0.462) | 53.464 (24.422, 95.306) | 0.546 (0.244, 0.961) | 2.657 (2.483, 2.831) |
| Central African Republic | 8.647 (3.822, 16.346) | 0.907 (0.421, 1.659) | 15.063 (6.575, 27.072) | 0.823 (0.337, 1.587) | -0.132 (-0.359, 0.096) |
| Republic of the Congo | 5.541 (2.483, 10.137) | 0.600 (0.267, 1.072) | 14.436 (6.776, 24.170) | 0.606 (0.263, 1.023) | -0.081 (-0.182, 0.019) |
| Democratic Republic of the Congo | 255.979 (103.880, 451.783) | 1.938 (0.821, 3.541) | 243.300 (96.801, 448.842) | 0.797 (0.318, 1.535) | -3.147 (-3.789, -2.500) |
| Republic of Equatorial Guinea | 1.124 (0.479, 2.008) | 0.708 (0.299, 1.276) | 17.613 (7.515, 32.201) | 3.737 (1.598, 7.394) | 7.154 (6.357, 7.958) |
| Gabonese Republic | 6.954 (3.127, 12.990) | 1.342 (0.596, 2.496) | 21.107 (9.447, 35.454) | 2.290 (1.041, 4.004) | 1.316 (0.846, 1.788) |
| Republic of Burundi | 9.394 (4.237, 17.582) | 0.447 (0.200, 0.810) | 11.402 (4.957, 21.245) | 0.284 (0.123, 0.531) | -1.943 (-2.204, -1.682) |
| Union of the Comoros | 0.838 (0.374, 1.402) | 0.503 (0.229, 0.861) | 1.737 (0.766, 3.038) | 0.395 (0.175, 0.691) | -1.099 (-1.311, -0.887) |
| Republic of Djibouti | 0.190 (0.084, 0.341) | 0.185 (0.080, 0.344) | 2.236 (1.007, 4.052) | 0.426 (0.195, 0.754) | 3.016 (2.763, 3.270) |
| State of Eritrea | 1.963 (0.828, 3.583) | 0.238 (0.103, 0.446) | 6.919 (2.956, 12.607) | 0.312 (0.148, 0.584) | 0.656 (0.430, 0.883) |
| Federal Democratic Republic of Ethiopia | 22.937 (10.407, 42.876) | 0.139 (0.063, 0.255) | 86.959 (39.524, 167.144) | 0.223 (0.101, 0.418) | 1.685 (1.484, 1.886) |
| Republic of Kenya | 21.006 (9.525, 37.233) | 0.286 (0.128, 0.499) | 116.620 (55.377, 206.980) | 0.577 (0.275, 1.023) | 2.850 (2.642, 3.058) |
| Republic of Madagascar | 26.529 (12.708, 47.169) | 0.600 (0.274, 1.058) | 52.910 (24.361, 94.267) | 0.573 (0.255, 1.037) | 0.135 (-0.071, 0.342) |
| Republic of Malawi | 10.675 (4.947, 19.069) | 0.332 (0.152, 0.577) | 47.887 (21.621, 84.765) | 0.746 (0.347, 1.291) | 2.873 (2.451, 3.297) |
| Republic of Mauritius | 22.030 (9.891, 36.296) | 2.906 (1.331, 4.786) | 36.830 (17.039, 62.371) | 2.157 (1.015, 3.620) | -1.949 (-2.391, -1.506) |
| Republic of Mozambique | 10.477 (4.973, 17.789) | 0.207 (0.097, 0.348) | 59.315 (26.065, 101.835) | 0.595 (0.265, 1.053) | 4.329 (3.978, 4.682) |
| Republic of Rwanda | 6.846 (3.060, 11.995) | 0.296 (0.129, 0.512) | 12.726 (5.660, 23.530) | 0.251 (0.109, 0.469) | -0.773 (-1.221, -0.322) |
| Republic of Seychelles | 0.455 (0.198, 0.793) | 0.805 (0.348, 1.401) | 0.697 (0.331, 1.215) | 0.608 (0.283, 1.060) | -0.794 (-1.069, -0.518) |
| Federal Republic of Somalia | 4.716 (1.985, 9.036) | 0.255 (0.107, 0.479) | 9.325 (4.063, 17.462) | 0.191 (0.086, 0.370) | -0.673 (-0.778, -0.569) |
| United Republic of Tanzania | 34.488 (15.784, 59.837) | 0.366 (0.165, 0.631) | 135.600 (61.581, 242.796) | 0.598 (0.263, 1.075) | 1.752 (1.559, 1.945) |
| Republic of Uganda | 13.852 (6.182, 23.741) | 0.248 (0.111, 0.436) | 36.370 (16.408, 66.282) | 0.280 (0.128, 0.519) | -0.183 (-0.516, 0.152) |
| Republic of Zambia | 10.252 (4.833, 17.994) | 0.419 (0.197, 0.739) | 33.594 (15.488, 59.895) | 0.560 (0.258, 1.005) | 0.919 (0.525, 1.315) |
| Republic of Botswana | 2.379 (1.088, 4.044) | 0.505 (0.233, 0.855) | 6.498 (3.053, 11.262) | 0.516 (0.243, 0.874) | 0.207 (-0.034, 0.449) |
| Kingdom of Lesotho | 4.049 (1.859, 7.897) | 0.538 (0.244, 1.026) | 14.540 (6.165, 26.564) | 1.536 (0.642, 2.783) | 4.239 (3.616, 4.865) |
| Republic of Namibia | 4.168 (1.878, 7.405) | 0.742 (0.333, 1.298) | 8.038 (3.579, 14.119) | 0.675 (0.301, 1.192) | -0.568 (-0.830, -0.306) |
| Republic of South Africa | 209.007 (99.417, 336.366) | 1.032 (0.491, 1.700) | 699.452 (348.437, 1108.665) | 1.641 (0.833, 2.580) | 1.901 (1.482, 2.321) |
| Kingdom of Eswatini | 1.641 (0.746, 2.826) | 0.704 (0.321, 1.214) | 4.088 (1.804, 7.182) | 0.870 (0.394, 1.582) | 0.993 (0.717, 1.269) |
| Republic of Zimbabwe | 10.298 (4.690, 17.750) | 0.298 (0.134, 0.505) | 27.750 (12.613, 48.004) | 0.461 (0.208, 0.786) | 1.904 (1.419, 2.393) |
| Republic of Benin | 3.561 (1.689, 6.244) | 0.196 (0.092, 0.342) | 20.007 (9.424, 33.965) | 0.432 (0.205, 0.746) | 2.939 (2.685, 3.193) |
| Burkina Faso | 3.788 (1.763, 6.711) | 0.103 (0.047, 0.177) | 19.883 (9.465, 33.988) | 0.243 (0.113, 0.410) | 3.348 (2.864, 3.835) |
| Republic of Cameroon | 12.815 (6.061, 22.803) | 0.336 (0.153, 0.597) | 92.226 (41.909, 172.541) | 0.805 (0.374, 1.513) | 3.501 (3.103, 3.901) |
| Republic of Cabo Verde | 0.513 (0.237, 0.867) | 0.224 (0.105, 0.372) | 2.255 (1.064, 4.022) | 0.487 (0.229, 0.840) | 2.583 (2.403, 2.764) |
| Republic of Chad | 5.396 (2.426, 10.189) | 0.206 (0.095, 0.396) | 20.283 (8.978, 35.640) | 0.392 (0.175, 0.677) | 2.240 (1.870, 2.612) |
| Republic of Côte d'Ivoire | 19.480 (8.769, 34.313) | 0.560 (0.254, 1.007) | 89.879 (39.751, 147.712) | 0.822 (0.368, 1.422) | 1.443 (1.204, 1.682) |
| Republic of the Gambia | 1.276 (0.600, 2.288) | 0.407 (0.191, 0.714) | 6.319 (2.620, 11.614) | 0.685 (0.288, 1.230) | 1.894 (1.660, 2.128) |
| Republic of Ghana | 22.794 (10.658, 39.175) | 0.452 (0.211, 0.761) | 401.633 (174.449, 707.393) | 2.749 (1.231, 5.029) | 6.764 (6.243, 7.288) |
| Republic of Guinea | 10.175 (4.762, 18.416) | 0.332 (0.156, 0.601) | 32.054 (14.858, 59.206) | 0.605 (0.280, 1.101) | 2.701 (2.423, 2.979) |
| Republic of Guinea-Bissau | 1.308 (0.609, 2.381) | 0.367 (0.171, 0.647) | 2.978 (1.227, 5.016) | 0.449 (0.189, 0.759) | 0.778 (0.654, 0.903) |
| Republic of Liberia | 4.551 (2.068, 8.044) | 0.417 (0.189, 0.731) | 9.732 (4.416, 17.513) | 0.444 (0.194, 0.789) | 1.301 (0.817, 1.788) |
| Republic of Mali | 15.994 (7.097, 28.933) | 0.431 (0.194, 0.779) | 88.938 (35.834, 154.561) | 1.022 (0.427, 1.820) | 3.495 (3.059, 3.933) |
| Islamic Republic of Mauritania | 4.851 (2.252, 8.471) | 0.532 (0.250, 0.910) | 22.077 (9.913, 39.373) | 1.119 (0.511, 1.992) | 2.501 (2.390, 2.613) |
| Republic of the Niger | 7.484 (3.558, 14.703) | 0.302 (0.141, 0.586) | 39.257 (17.493, 71.903) | 0.521 (0.240, 0.949) | 2.404 (2.017, 2.792) |
| Federal Republic of Nigeria | 94.475 (43.621, 177.772) | 0.239 (0.109, 0.446) | 424.788 (178.702, 706.105) | 0.499 (0.209, 0.842) | 2.593 (2.170, 3.017) |
| Democratic Republic of Sao Tome and Principe | 0.182 (0.080, 0.303) | 0.305 (0.134, 0.505) | 0.857 (0.386, 1.465) | 0.799 (0.369, 1.402) | 3.398 (3.251, 3.545) |
| Republic of Senegal | 10.768 (4.973, 17.537) | 0.366 (0.169, 0.611) | 28.658 (12.872, 53.295) | 0.403 (0.183, 0.742) | 0.354 (0.139, 0.569) |
| Republic of Sierra Leone | 4.405 (2.012, 7.523) | 0.229 (0.111, 0.386) | 11.851 (5.331, 21.250) | 0.332 (0.151, 0.595) | 1.713 (1.473, 1.953) |
| Togolese Republic | 2.557 (1.205, 4.287) | 0.251 (0.116, 0.414) | 16.971 (8.089, 29.683) | 0.546 (0.254, 0.956) | 2.720 (2.290, 3.152) |
| American Samoa | 0.599 (0.260, 0.978) | 2.622 (1.174, 4.285) | 1.349 (0.676, 2.323) | 3.057 (1.502, 5.289) | 0.351 (0.246, 0.457) |
| Bermuda | 1.007 (0.470, 1.687) | 1.740 (0.804, 2.891) | 0.843 (0.380, 1.510) | 0.597 (0.270, 1.042) | -3.097 (-3.681, -2.509) |
| Cook Islands | 0.259 (0.128, 0.431) | 2.172 (1.073, 3.734) | 0.858 (0.397, 1.466) | 3.460 (1.622, 5.859) | 1.336 (1.236, 1.437) |
| Greenland | 0.722 (0.327, 1.219) | 2.719 (1.239, 4.729) | 0.889 (0.456, 1.536) | 1.551 (0.802, 2.660) | -1.824 (-1.883, -1.765) |
| Guam | 3.780 (1.774, 6.304) | 5.425 (2.586, 8.751) | 6.389 (3.150, 10.771) | 3.233 (1.609, 5.394) | -1.283 (-1.441, -1.126) |
| Principality of Monaco | 13.342 (6.020, 22.339) | 16.634 (7.560, 27.428) | 9.455 (4.371, 15.566) | 8.472 (3.924, 13.736) | -2.383 (-2.611, -2.155) |
| Republic of Nauru | 0.179 (0.078, 0.315) | 3.690 (1.658, 6.447) | 0.217 (0.094, 0.375) | 3.695 (1.611, 6.381) | -0.230 (-1.018, 0.565) |
| Republic of Niue | 0.042 (0.019, 0.074) | 1.868 (0.840, 3.263) | 0.072 (0.034, 0.124) | 3.496 (1.673, 5.883) | 2.147 (2.037, 2.256) |
| Northern Mariana Islands | 1.024 (0.497, 1.753) | 5.853 (2.835, 10.014) | 1.235 (0.594, 2.123) | 2.877 (1.349, 4.919) | -2.779 (-3.050, -2.507) |
| Republic of Palau | 0.292 (0.126, 0.539) | 3.071 (1.265, 5.468) | 0.831 (0.381, 1.475) | 4.266 (1.939, 7.283) | 1.194 (1.109, 1.278) |
| Puerto Rico | 27.511 (12.349, 47.835) | 0.800 (0.375, 1.365) | 35.916 (16.058, 62.751) | 0.523 (0.237, 0.905) | -1.540 (-1.725, -1.356) |
| Saint Kitts and Nevis | 0.766 (0.354, 1.329) | 2.233 (1.094, 3.814) | 0.705 (0.325, 1.186) | 1.197 (0.559, 1.972) | -2.037 (-2.501, -1.572) |
| Republic of San Marino | 1.818 (0.811, 3.012) | 4.877 (2.204, 7.939) | 1.525 (0.633, 2.653) | 1.725 (0.758, 2.982) | -2.911 (-3.188, -2.634) |
| Tokelau | 0.016 (0.008, 0.026) | 1.268 (0.596, 2.093) | 0.030 (0.014, 0.053) | 2.063 (0.965, 3.529) | 1.783 (1.692, 1.874) |
| Tuvalu | 0.032 (0.015, 0.055) | 0.531 (0.246, 0.900) | 0.064 (0.030, 0.108) | 0.652 (0.305, 1.096) | 0.278 (0.082, 0.474) |
| United States Virgin Islands | 0.862 (0.404, 1.407) | 1.124 (0.530, 1.880) | 2.103 (0.935, 3.814) | 1.268 (0.584, 2.203) | 0.506 (0.184, 0.830) |
| Republic of South Sudan | 16.323 (7.491, 29.318) | 0.709 (0.322, 1.267) | 27.515 (12.718, 51.501) | 0.834 (0.374, 1.542) | 0.624 (0.435, 0.814) |
| Republic of Sudan | 71.930 (31.591, 133.842) | 0.803 (0.350, 1.482) | 189.921 (77.495, 349.393) | 0.900 (0.369, 1.628) | 0.360 (0.269, 0.451) |

TABLE S3. Crude mortality rate of IS death by age, period and median birth cohorts in Global and different SDI areas.(per 100 000)

| Median Period | Age group (Global) | | | | | | | | | | | | | | | Median  Birth Cohort |
| --- | --- | --- | --- | --- | --- | --- | --- | --- | --- | --- | --- | --- | --- | --- | --- | --- |
| 25-29 | 30-34 | 35-39 | 40-44 | 45-49 | 50-54 | 55-59 | 60-64 | 65-69 | 70-74 | 75-79 | 80-84 | 85-89 | 90-94 | >95 |
|  |  |  |  |  |  |  |  |  |  |  |  |  |  |  | 12.262 | 1897 |
|  |  |  |  |  |  |  |  |  |  |  |  |  |  | 8.194 | 11.471 | 1902 |
|  |  |  |  |  |  |  |  |  |  |  |  |  | 4.676 | 7.630 | 9.989 | 1907 |
|  |  |  |  |  |  |  |  |  |  |  |  | 2.257 | 4.316 | 6.841 | 9.126 | 1912 |
|  |  |  |  |  |  |  |  |  |  |  | 1.081 | 1.870 | 3.470 | 5.500 | 8.000 | 1917 |
|  |  |  |  |  |  |  |  |  |  | 0.590 | 0.986 | 1.672 | 3.111 | 5.215 | 7.892 | 1922 |
|  |  |  |  |  |  |  |  |  | 0.256 | 0.527 | 0.877 | 1.516 | 2.782 | 4.765 |  | 1927 |
|  |  |  |  |  |  |  |  | 0.134 | 0.219 | 0.470 | 0.793 | 1.372 | 2.555 |  |  | 1932 |
|  |  |  |  |  |  |  | 0.052 | 0.117 | 0.203 | 0.436 | 0.724 | 1.318 |  |  |  | 1937 |
|  |  |  |  |  |  | 0.029 | 0.045 | 0.108 | 0.188 | 0.393 | 0.712 |  |  |  |  | 1942 |
|  |  |  |  |  | 0.014 | 0.026 | 0.044 | 0.106 | 0.176 | 0.405 |  |  |  |  |  | 1947 |
|  |  |  |  | 0.006 | 0.013 | 0.028 | 0.047 | 0.108 | 0.196 |  |  |  |  |  |  | 1952 |
|  |  |  | 0.003 | 0.006 | 0.014 | 0.030 | 0.049 | 0.116 |  |  |  |  |  |  |  | 1957 |
|  |  | 0.002 | 0.003 | 0.006 | 0.015 | 0.030 | 0.052 |  |  |  |  |  |  |  |  | 1962 |
|  | 0.001 | 0.002 | 0.003 | 0.007 | 0.016 | 0.032 |  |  |  |  |  |  |  |  |  | 1967 |
| 1994 | 0.001 | 0.002 | 0.004 | 0.007 | 0.017 |  |  |  |  |  |  |  |  |  |  | 1972 |
| 1999 | 0.001 | 0.002 | 0.004 | 0.009 |  |  |  |  |  |  |  |  |  |  |  | 1977 |
| 2004 | 0.001 | 0.003 | 0.005 |  |  |  |  |  |  |  |  |  |  |  |  | 1982 |
| 2009 | 0.001 | 0.003 |  |  |  |  |  |  |  |  |  |  |  |  |  | 1987 |
| 2014 | 0.001 |  |  |  |  |  |  |  |  |  |  |  |  |  |  | 1992 |
| 2019 |  |  |  |  |  |  |  |  |  |  |  |  |  |  |  |  |
| Median Period | Age group (High SDI) | | | | | | | | | | | | | | | Median  Birth Cohort |
| 25-29 | 30-34 | 35-39 | 40-44 | 45-49 | 50-54 | 55-59 | 60-64 | 65-69 | 70-74 | 75-79 | 80-84 | 85-89 | 90-94 | >95 |
|  |  |  |  |  |  |  |  |  |  |  |  |  |  |  | 15.610 | 1897 |
|  |  |  |  |  |  |  |  |  |  |  |  |  |  | 10.731 | 14.610 | 1902 |
|  |  |  |  |  |  |  |  |  |  |  |  |  | 6.131 | 10.053 | 12.483 | 1907 |
|  |  |  |  |  |  |  |  |  |  |  |  | 3.211 | 5.642 | 8.571 | 11.034 | 1912 |
|  |  |  |  |  |  |  |  |  |  |  | 1.654 | 2.920 | 4.331 | 6.774 | 9.790 | 1917 |
|  |  |  |  |  |  |  |  |  |  | 0.813 | 1.465 | 2.204 | 3.445 | 6.024 | 9.397 | 1922 |
|  |  |  |  |  |  |  |  |  | 0.316 | 0.722 | 1.068 | 1.707 | 2.844 | 5.301 |  | 1927 |
|  |  |  |  |  |  |  |  | 0.167 | 0.284 | 0.526 | 0.819 | 1.415 | 2.580 |  |  | 1932 |
|  |  |  |  |  |  |  | 0.060 | 0.148 | 0.200 | 0.395 | 0.641 | 1.295 |  |  |  | 1937 |
|  |  |  |  |  |  | 0.035 | 0.056 | 0.113 | 0.157 | 0.326 | 0.619 |  |  |  |  | 1942 |
|  |  |  |  |  | 0.018 | 0.034 | 0.046 | 0.094 | 0.134 | 0.338 |  |  |  |  |  | 1947 |
|  |  |  |  | 0.009 | 0.019 | 0.032 | 0.045 | 0.087 | 0.153 |  |  |  |  |  |  | 1952 |
|  |  |  | 0.005 | 0.009 | 0.019 | 0.032 | 0.043 | 0.096 |  |  |  |  |  |  |  | 1957 |
|  |  | 0.003 | 0.005 | 0.009 | 0.020 | 0.030 | 0.048 |  |  |  |  |  |  |  |  | 1962 |
|  | 0.002 | 0.003 | 0.006 | 0.011 | 0.021 | 0.035 |  |  |  |  |  |  |  |  |  | 1967 |
| 1994 | 0.002 | 0.004 | 0.007 | 0.013 | 0.026 |  |  |  |  |  |  |  |  |  |  | 1972 |
| 1999 | 0.002 | 0.005 | 0.009 | 0.017 |  |  |  |  |  |  |  |  |  |  |  | 1977 |
| 2004 | 0.003 | 0.006 | 0.011 |  |  |  |  |  |  |  |  |  |  |  |  | 1982 |
| 2009 | 0.003 | 0.007 |  |  |  |  |  |  |  |  |  |  |  |  |  | 1987 |
| 2014 | 0.004 |  |  |  |  |  |  |  |  |  |  |  |  |  |  | 1992 |
| 2019 |  |  |  |  |  |  |  |  |  |  |  |  |  |  |  |  |
| Median Period | Age group (High middle SDI) | | | | | | | | | | | | | | | Median  Birth Cohort |
| 25-29 | 30-34 | 35-39 | 40-44 | 45-49 | 50-54 | 55-59 | 60-64 | 65-69 | 70-74 | 75-79 | 80-84 | 85-89 | 90-94 | >95 |
|  |  |  |  |  |  |  |  |  |  |  |  |  |  |  | 16.967 | 1897 |
|  |  |  |  |  |  |  |  |  |  |  |  |  |  | 11.017 | 15.633 | 1902 |
|  |  |  |  |  |  |  |  |  |  |  |  |  | 6.727 | 10.131 | 14.166 | 1907 |
|  |  |  |  |  |  |  |  |  |  |  |  | 3.003 | 6.065 | 9.661 | 12.803 | 1912 |
|  |  |  |  |  |  |  |  |  |  |  | 1.517 | 2.348 | 5.361 | 8.037 | 10.655 | 1917 |
|  |  |  |  |  |  |  |  |  |  | 0.884 | 1.298 | 2.352 | 4.936 | 7.335 | 10.859 | 1922 |
|  |  |  |  |  |  |  |  |  | 0.412 | 0.753 | 1.349 | 2.394 | 4.388 | 7.064 |  | 1927 |
|  |  |  |  |  |  |  |  | 0.213 | 0.323 | 0.754 | 1.335 | 2.222 | 4.162 |  |  | 1932 |
|  |  |  |  |  |  |  | 0.085 | 0.169 | 0.341 | 0.744 | 1.237 | 2.181 |  |  |  | 1937 |
|  |  |  |  |  |  | 0.044 | 0.065 | 0.173 | 0.329 | 0.673 | 1.221 |  |  |  |  | 1942 |
|  |  |  |  |  | 0.020 | 0.034 | 0.067 | 0.167 | 0.292 | 0.636 |  |  |  |  |  | 1947 |
|  |  |  |  | 0.008 | 0.016 | 0.040 | 0.075 | 0.172 | 0.306 |  |  |  |  |  |  | 1952 |
|  |  |  | 0.004 | 0.007 | 0.019 | 0.043 | 0.077 | 0.171 |  |  |  |  |  |  |  | 1957 |
|  |  | 0.002 | 0.003 | 0.008 | 0.020 | 0.043 | 0.075 |  |  |  |  |  |  |  |  | 1962 |
|  | 0.001 | 0.002 | 0.003 | 0.008 | 0.021 | 0.043 |  |  |  |  |  |  |  |  |  | 1967 |
| 1994 | 0.001 | 0.002 | 0.004 | 0.010 | 0.021 |  |  |  |  |  |  |  |  |  |  | 1972 |
| 1999 | 0.001 | 0.002 | 0.005 | 0.011 |  |  |  |  |  |  |  |  |  |  |  | 1977 |
| 2004 | 0.001 | 0.003 | 0.005 |  |  |  |  |  |  |  |  |  |  |  |  | 1982 |
| 2009 | 0.001 | 0.003 |  |  |  |  |  |  |  |  |  |  |  |  |  | 1987 |
| 2014 | 0.002 |  |  |  |  |  |  |  |  |  |  |  |  |  |  | 1992 |
| 2019 |  |  |  |  |  |  |  |  |  |  |  |  |  |  |  |  |
| Median Period | Age group (Middle SDI) | | | | | | | | | | | | | | | Median  Birth Cohort |
| 25-29 | 30-34 | 35-39 | 40-44 | 45-49 | 50-54 | 55-59 | 60-64 | 65-69 | 70-74 | 75-79 | 80-84 | 85-89 | 90-94 | >95 |
|  |  |  |  |  |  |  |  |  |  |  |  |  |  |  | 3.086 | 1897 |
|  |  |  |  |  |  |  |  |  |  |  |  |  |  | 2.339 | 3.484 | 1902 |
|  |  |  |  |  |  |  |  |  |  |  |  |  | 1.458 | 2.375 | 3.790 | 1907 |
|  |  |  |  |  |  |  |  |  |  |  |  | 0.757 | 1.442 | 2.647 | 4.186 | 1912 |
|  |  |  |  |  |  |  |  |  |  |  | 0.430 | 0.729 | 1.610 | 2.691 | 4.112 | 1917 |
|  |  |  |  |  |  |  |  |  |  | 0.282 | 0.433 | 0.811 | 1.693 | 2.808 | 3.757 | 1922 |
|  |  |  |  |  |  |  |  |  | 0.139 | 0.276 | 0.476 | 0.862 | 1.771 | 2.629 |  | 1927 |
|  |  |  |  |  |  |  |  | 0.087 | 0.140 | 0.300 | 0.514 | 0.929 | 1.720 |  |  | 1932 |
|  |  |  |  |  |  |  | 0.037 | 0.084 | 0.146 | 0.321 | 0.560 | 0.968 |  |  |  | 1937 |
|  |  |  |  |  |  | 0.023 | 0.036 | 0.087 | 0.152 | 0.343 | 0.603 |  |  |  |  | 1942 |
|  |  |  |  |  | 0.012 | 0.022 | 0.036 | 0.092 | 0.160 | 0.373 |  |  |  |  |  | 1947 |
|  |  |  |  | 0.005 | 0.011 | 0.022 | 0.039 | 0.097 | 0.180 |  |  |  |  |  |  | 1952 |
|  |  |  | 0.003 | 0.005 | 0.012 | 0.025 | 0.043 | 0.111 |  |  |  |  |  |  |  | 1957 |
|  |  | 0.002 | 0.003 | 0.005 | 0.013 | 0.027 | 0.049 |  |  |  |  |  |  |  |  | 1962 |
|  | 0.001 | 0.002 | 0.003 | 0.006 | 0.015 | 0.031 |  |  |  |  |  |  |  |  |  | 1967 |
| 1994 | 0.001 | 0.002 | 0.003 | 0.007 | 0.016 |  |  |  |  |  |  |  |  |  |  | 1972 |
| 1999 | 0.001 | 0.002 | 0.004 | 0.008 |  |  |  |  |  |  |  |  |  |  |  | 1977 |
| 2004 | 0.001 | 0.002 | 0.005 |  |  |  |  |  |  |  |  |  |  |  |  | 1982 |
| 2009 | 0.001 | 0.003 |  |  |  |  |  |  |  |  |  |  |  |  |  | 1987 |
| 2014 | 0.001 |  |  |  |  |  |  |  |  |  |  |  |  |  |  | 1992 |
| 2019 |  |  |  |  |  |  |  |  |  |  |  |  |  |  | 3.086 |  |
| Median Period | Age group (Low middle SDI) | | | | | | | | | | | | | | | Median  Birth Cohort |
| 25-29 | 30-34 | 35-39 | 40-44 | 45-49 | 50-54 | 55-59 | 60-64 | 65-69 | 70-74 | 75-79 | 80-84 | 85-89 | 90-94 | >95 |
|  |  |  |  |  |  |  |  |  |  |  |  |  |  |  | 1.959 | 1897 |
|  |  |  |  |  |  |  |  |  |  |  |  |  |  | 1.340 | 1.913 | 1902 |
|  |  |  |  |  |  |  |  |  |  |  |  |  | 0.909 | 1.422 | 2.240 | 1907 |
|  |  |  |  |  |  |  |  |  |  |  |  | 0.559 | 0.965 | 1.576 | 2.779 | 1912 |
|  |  |  |  |  |  |  |  |  |  |  | 0.396 | 0.574 | 1.131 | 1.823 | 3.438 | 1917 |
|  |  |  |  |  |  |  |  |  |  | 0.274 | 0.416 | 0.633 | 1.244 | 2.210 | 2.972 | 1922 |
|  |  |  |  |  |  |  |  |  | 0.133 | 0.284 | 0.423 | 0.676 | 1.404 | 1.900 |  | 1927 |
|  |  |  |  |  |  |  |  | 0.078 | 0.139 | 0.293 | 0.448 | 0.742 | 1.164 |  |  | 1932 |
|  |  |  |  |  |  |  | 0.030 | 0.076 | 0.138 | 0.301 | 0.440 | 0.689 |  |  |  | 1937 |
|  |  |  |  |  |  | 0.019 | 0.032 | 0.078 | 0.150 | 0.279 | 0.474 |  |  |  |  | 1942 |
|  |  |  |  |  | 0.007 | 0.020 | 0.033 | 0.086 | 0.143 | 0.316 |  |  |  |  |  | 1947 |
|  |  |  |  | 0.003 | 0.008 | 0.021 | 0.038 | 0.090 | 0.167 |  |  |  |  |  |  | 1952 |
|  |  |  | 0.002 | 0.003 | 0.009 | 0.024 | 0.042 | 0.098 |  |  |  |  |  |  |  | 1957 |
|  |  | 0.001 | 0.002 | 0.003 | 0.011 | 0.029 | 0.049 |  |  |  |  |  |  |  |  | 1962 |
|  | 0.000 | 0.001 | 0.002 | 0.004 | 0.012 | 0.028 |  |  |  |  |  |  |  |  |  | 1967 |
| 1994 | 0.001 | 0.001 | 0.002 | 0.005 | 0.013 |  |  |  |  |  |  |  |  |  |  | 1972 |
| 1999 | 0.001 | 0.001 | 0.002 | 0.005 |  |  |  |  |  |  |  |  |  |  |  | 1977 |
| 2004 | 0.001 | 0.001 | 0.003 |  |  |  |  |  |  |  |  |  |  |  |  | 1982 |
| 2009 | 0.001 | 0.002 |  |  |  |  |  |  |  |  |  |  |  |  |  | 1987 |
| 2014 | 0.001 |  |  |  |  |  |  |  |  |  |  |  |  |  |  | 1992 |
| 2019 |  |  |  |  |  |  |  |  |  |  |  |  |  |  |  |  |
| Median Period | Age group (Low SDI) | | | | | | | | | | | | | | | Median  Birth Cohort |
| 25-29 | 30-34 | 35-39 | 40-44 | 45-49 | 50-54 | 55-59 | 60-64 | 65-69 | 70-74 | 75-79 | 80-84 | 85-89 | 90-94 | >95 |
|  |  |  |  |  |  |  |  |  |  |  |  |  |  |  | 0.767 | 1897 |
|  |  |  |  |  |  |  |  |  |  |  |  |  |  | 0.641 | 0.732 | 1902 |
|  |  |  |  |  |  |  |  |  |  |  |  |  | 0.446 | 0.561 | 0.708 | 1907 |
|  |  |  |  |  |  |  |  |  |  |  |  | 0.330 | 0.405 | 0.584 | 0.767 | 1912 |
|  |  |  |  |  |  |  |  |  |  |  | 0.224 | 0.302 | 0.414 | 0.627 | 1.037 | 1917 |
|  |  |  |  |  |  |  |  |  |  | 0.155 | 0.209 | 0.310 | 0.444 | 0.804 | 1.052 | 1922 |
|  |  |  |  |  |  |  |  |  | 0.073 | 0.148 | 0.207 | 0.315 | 0.515 | 0.799 |  | 1927 |
|  |  |  |  |  |  |  |  | 0.046 | 0.069 | 0.145 | 0.203 | 0.336 | 0.513 |  |  | 1932 |
|  |  |  |  |  |  |  | 0.015 | 0.042 | 0.065 | 0.144 | 0.208 | 0.334 |  |  |  | 1937 |
|  |  |  |  |  |  | 0.009 | 0.015 | 0.040 | 0.066 | 0.145 | 0.213 |  |  |  |  | 1942 |
|  |  |  |  |  | 0.004 | 0.008 | 0.014 | 0.040 | 0.066 | 0.146 |  |  |  |  |  | 1947 |
|  |  |  |  | 0.002 | 0.004 | 0.008 | 0.014 | 0.042 | 0.069 |  |  |  |  |  |  | 1952 |
|  |  |  | 0.001 | 0.001 | 0.004 | 0.008 | 0.015 | 0.044 |  |  |  |  |  |  |  | 1957 |
|  |  | 0.000 | 0.001 | 0.002 | 0.004 | 0.009 | 0.016 |  |  |  |  |  |  |  |  | 1962 |
|  | 0.000 | 0.000 | 0.001 | 0.002 | 0.004 | 0.009 |  |  |  |  |  |  |  |  |  | 1967 |
| 1994 | 0.000 | 0.000 | 0.001 | 0.002 | 0.005 |  |  |  |  |  |  |  |  |  |  | 1972 |
| 1999 | 0.000 | 0.001 | 0.001 | 0.002 |  |  |  |  |  |  |  |  |  |  |  | 1977 |
| 2004 | 0.000 | 0.001 | 0.001 |  |  |  |  |  |  |  |  |  |  |  |  | 1982 |
| 2009 | 0.000 | 0.001 |  |  |  |  |  |  |  |  |  |  |  |  |  | 1987 |
| 2014 | 0.000 |  |  |  |  |  |  |  |  |  |  |  |  |  |  | 1992 |
| 2019 |  |  |  |  |  |  |  |  |  |  |  |  |  |  |  |  |


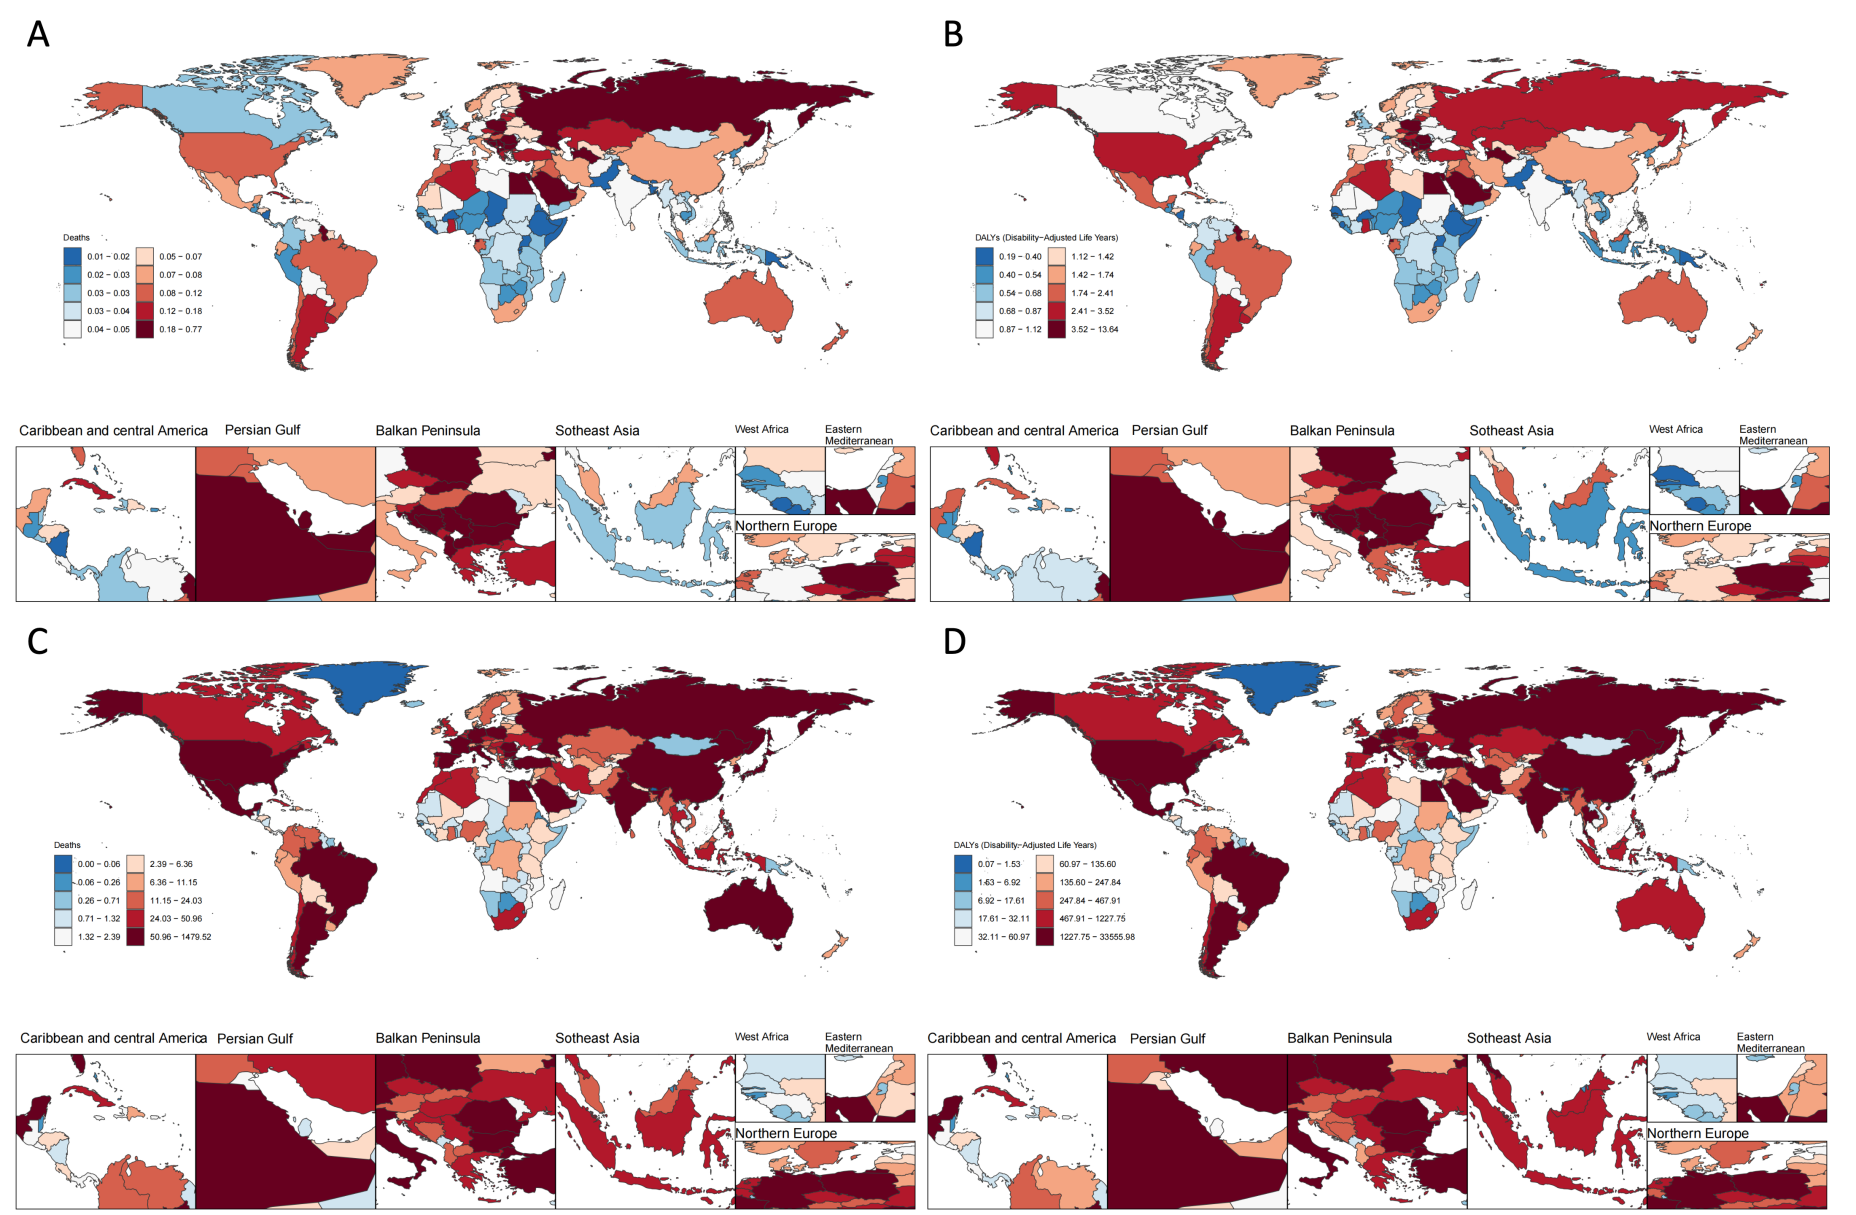


FIG S1:Global burden of disease of IS attributed to high dietary SSB in 204 countries and territories in 2021. (A) ASDR of IS.(B) ASDR of IS. (C) Mortality from IS. (D)DALY rate of IS


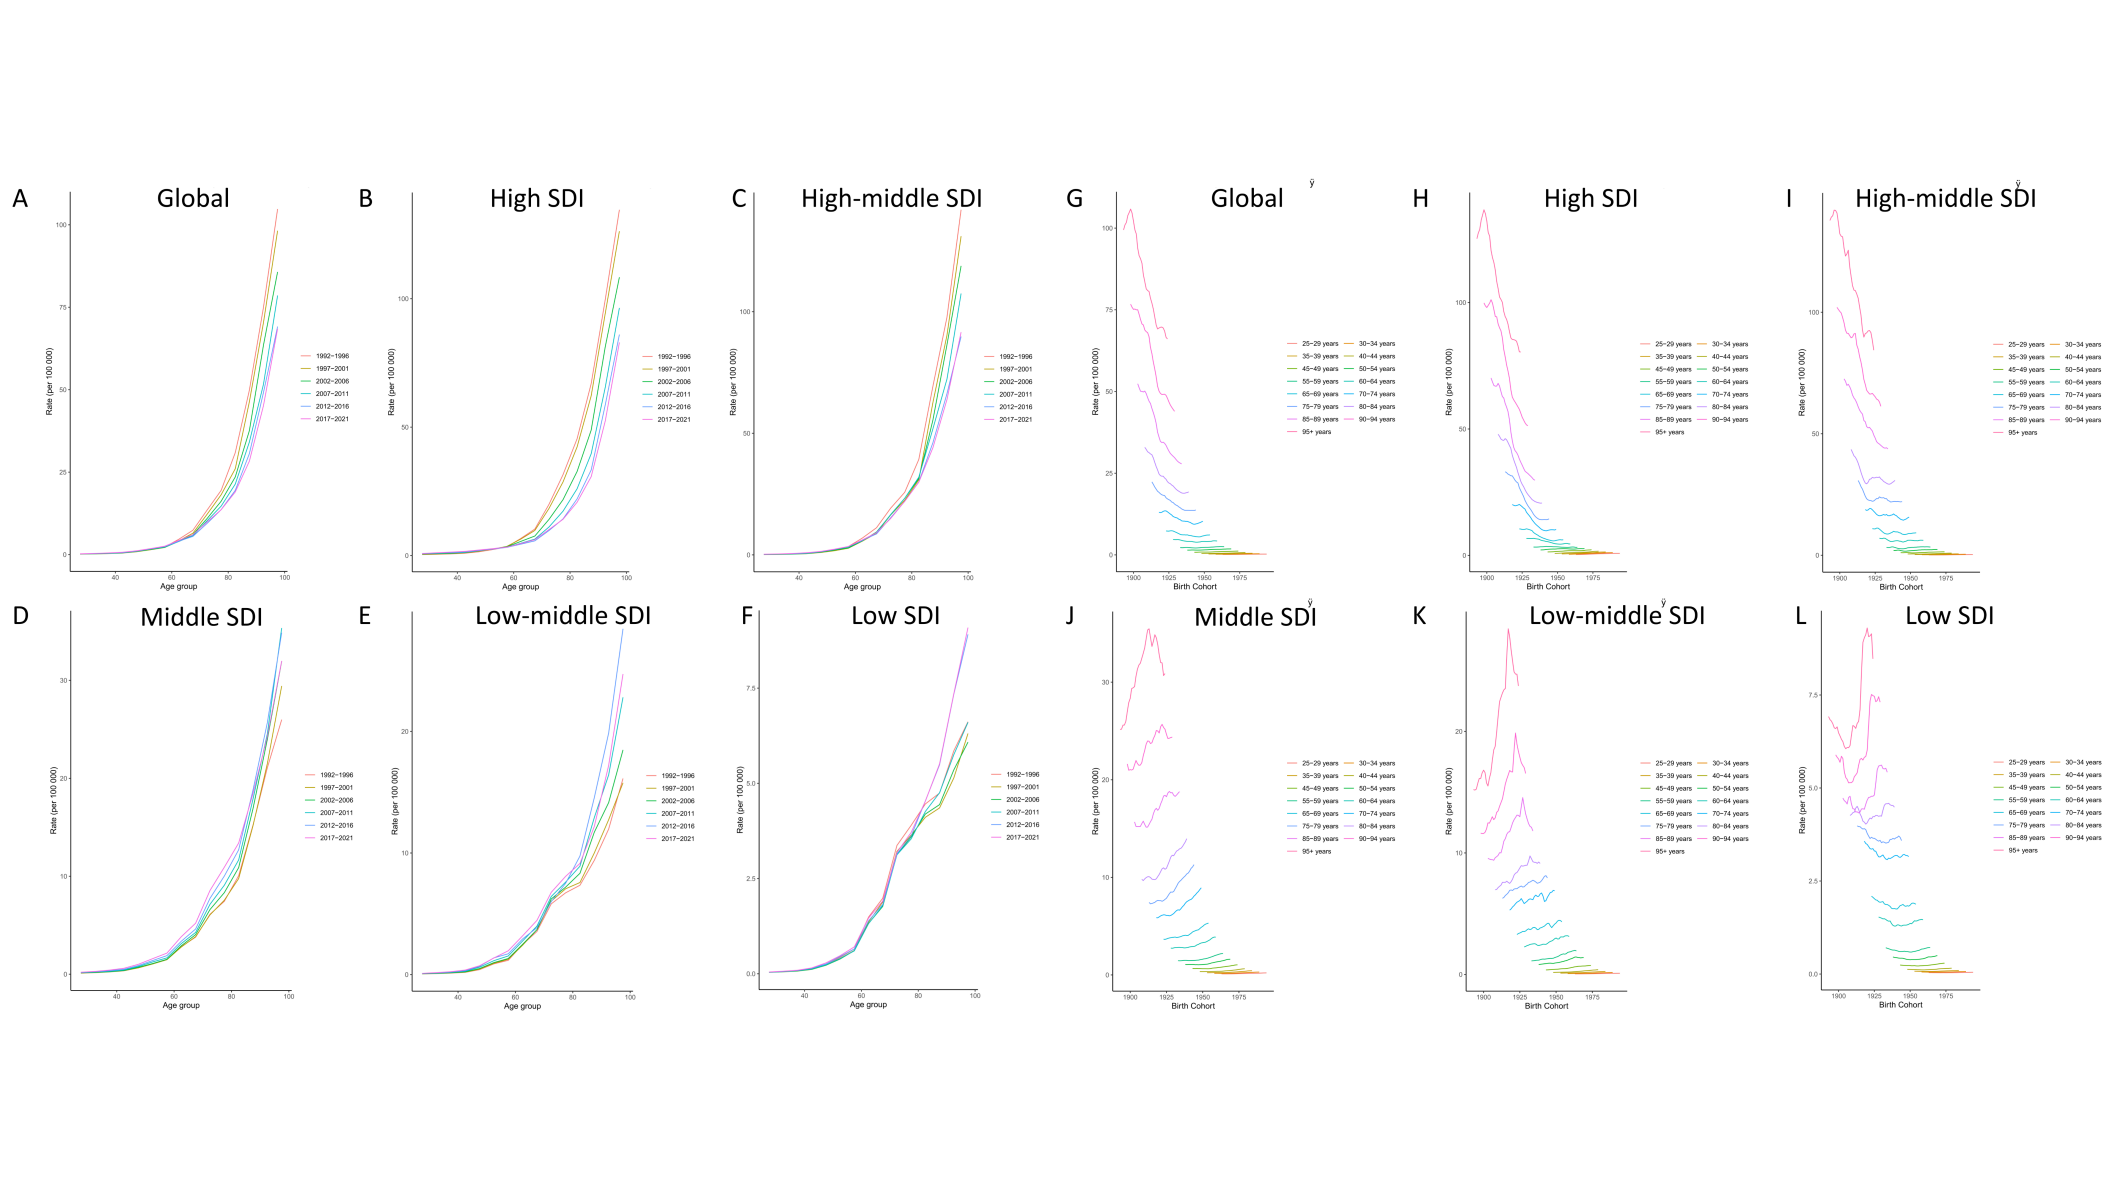


FIG S2.A-F: DALYs of IS attributed to SSB by period across Global, SDI areas.G-L cohort-specific mortality rate of IS attributed to SSB by age group .
